# Supplementary material for: A multigene phylogeny toward a new phylogenetic classification of Leotiomycetes
Source: PubMed Central journal article supplement (PMC7325659; doi:10.1186/s43008-019-0002-x), 2019-06-07
Supplement: 43008_2019_2_MOESM2_ESM.pdf [file 43008_2019_2_MOESM2_ESM.pdf]

Suppl. Data Table S2. Sequences used in ITS phylogeny, Suppl. Data Fig 2. Accepted family based on ITS and 15-gene analyses in this paper.

(1) Family from Baral (2016) unless otherwise stated

(2) Family from Index Fungorum where not treated by Baral (2016)

(3) ExType represents a type specimen; TypeSpecies a specimen that has been identified as the type species of the genus

| Genbank accession or code | Species                                    | Voucher              | Type status of specimen (3) | Family (1, 2)                     | Accepted family               | Notes                                         |
|---------------------------|--------------------------------------------|----------------------|-----------------------------|-----------------------------------|-------------------------------|-----------------------------------------------|
| NR_119482                 | <i>Acephala applanata</i>                  | CBS 109321           | exTypeSpecimen              | Mollisiaceae                      | Mollisiaceae                  |                                               |
| Acema1                    | <i>Acephala macrosclerotiorum</i>          | CBS 123555           |                             | Mollisiaceae                      | Mollisiaceae                  | ITS extracted from JGI genome                 |
| JX124323                  | <i>Acidea extrema</i>                      | MH-2012 strain 1180  | exTypeSpecimen              | Helotiales incertae sedis (2)     | Discinella-Pezoloma lineage   |                                               |
| KF874619                  | <i>Acidomelania panicicola</i>             | 61R8                 | exTypeSpecimen              | Mollisiaceae                      | Mollisiaceae                  |                                               |
| AY204588                  | <i>Alatospora acuminata</i>                | CCM F-12186          | TypeSpecies                 | Leotiales (2)                     | Leotiales incertae sedis      | neotype                                       |
| DSM104360                 | <i>Alatospora acuminata</i>                | DSM 104360           | TypeSpecies                 | Leotiales (2)                     | Leotiales incertae sedis      | GenBank AY204588                              |
| KT005452                  | <i>Albotricha acutipila</i>                | D40d                 | Type Species                | Lachnaceae                        | Lachnaceae                    |                                               |
| AB481234                  | <i>Albotricha acutipila</i>                | FC-2262, TNS-F-16740 | TypeSpecies                 | Lachnaceae                        | Lachnaceae                    |                                               |
| AB481235                  | <i>Albotricha albotestacea</i>             | FC-2094, TNS-F-16497 |                             | Lachnaceae                        | Lachnaceae                    |                                               |
| NR_157437                 | <i>Allantophomopsiella pseudotsugae</i>    | CBS 320.53           | exTypeSpecimen              | Phacidiaaceae                     | Phacidiaaceae                 |                                               |
| KJ663828                  | <i>Allantophomopsiella pseudotsugae</i>    | CBS 562.63           | TypeSpecies                 | Phacidiaaceae                     | Phacidiaaceae                 |                                               |
| NR_132922                 | <i>Allantophomopsis lunata</i>             | CBS 137781           | exTypeSpecimen              | Phacidiaaceae                     | Phacidiaaceae                 | epitype                                       |
| KL391                     | <i>Ameghiniella australis</i>              | FH 01146515          | TypeSpecies                 | Cordieriticaeae                   | Cordieriticaeae               | GenBank MH752070                              |
| JN033411                  | <i>Amicodisca castaneae</i>                | KUS F51917           |                             | Hyaloscyphaceae                   | Hyaloscyphaceae               |                                               |
| JN033389                  | <i>Amicodisca</i> sp                       | KUS F51377           |                             | Hyaloscyphaceae                   | Hyaloscyphaceae               |                                               |
| MH221521                  | <i>Amicodisca virella</i>                  | SBRH 828             | TypeSpecies                 | Hyaloscyphaceae                   | Hyaloscyphaceae               |                                               |
| NR_119450                 | <i>Amorphotheca resiniae</i>               | ATCC 200942          | exTypeSpecimen              | Amorphothecaceae                  | Amorphothecaceae              |                                               |
| EU030278                  | <i>Amorphotheca resiniae</i>               | ATCC 22711           |                             | Amorphothecaceae                  | Amorphothecaceae              | JGI genome also available for this specimen   |
| KM272369                  | <i>Amylocarpus encephaloides</i>           | 017cN                | TypeSpecies                 | Helotiales incertae sedis         | Helotiaceae                   |                                               |
| AJ133431                  | <i>Antarctomyces psychrotrophicus</i>      | IMI 378528           | exTypeSpecimen              | Pezizellaceae                     | Thelebolaceae                 |                                               |
| NR_111345                 | <i>Aquapoterium pinicola</i>               | ATCC MYA-4213        | exTypeSpecimen              | Helotiales incertae sedis (2)     | Helotiales incertae sedis     |                                               |
| MH578553                  | <i>Arachnopeziza araneosa</i>              | ICMP 21731           |                             | Arachnopezizaceae                 | Arachnopezizaceae             | MWLR genome also available for this specimen  |
| JN033436                  | <i>Arachnopeziza aurata</i>                | TNS-F-11212          |                             | Arachnopezizaceae                 | Arachnopezizaceae             |                                               |
| A_aurel_Hosoya            | <i>Arachnopeziza aurelia</i>               | TNS-F-40009          | TypeSpecies                 | Arachnopezizaceae                 | Arachnopezizaceae             | GenBank LC425050                              |
| JN033445                  | <i>Arachnopeziza obtusipila</i>            | TNS-F-12768          |                             | Arachnopezizaceae                 | Arachnopezizaceae             |                                               |
| MH578549                  | <i>Arachnopeziza</i> sp on <i>Dianella</i> | ICMP 22831           |                             | Arachnopezizaceae                 | Arachnopezizaceae             |                                               |
| KC834042                  | <i>Arbusculina fragmentans</i>             | CCM F-13486          |                             | Pezizomycotina incertae sedis (2) | Hyaloscyphaceae               |                                               |
| KP234351                  | ' <i>Articulospora</i> ' proliferata       | CCM F-11200          |                             |                                   |                               |                                               |
| DSM_104345                | <i>Articulospora tetracladia</i>           | DSM 104345           | TypeSpecies                 | Discinella-Pezoloma lineage       | Discinella-Pezoloma lineage   | GenBank MK226461                              |
| AF260815                  | <i>Ascocalyx abietina</i>                  | ATCC 28379           |                             | Godroniaceae                      | Godroniaceae                  |                                               |
| FJ746661                  | <i>Ascocalyx abietina</i>                  | ATCC 34573           |                             | Godroniaceae                      | Godroniaceae                  |                                               |
| JN033406                  | <i>Ascocoryne cyllichnium</i>              | KUS F52351           |                             | Gelatinodiscaceae                 | Gelatinodiscaceae             |                                               |
| HM152546                  | <i>Ascocoryne sarcoides</i>                | CBS 171.56           | TypeSpecies                 | Gelatinodiscaceae                 | Gelatinodiscaceae             |                                               |
| Ascsa1                    | <i>Ascocoryne sarcoides</i>                | NRRL 50072           | TypeSpecies                 | Gelatinodiscaceae                 | Gelatinodiscaceae             | ITS extracted from JGI genome                 |
| MH682237                  | <i>Ascocoryne</i> sp                       | ICMP 22839           |                             | Gelatinodiscaceae                 | Gelatinodiscaceae             |                                               |
| KY462798                  | <i>Ascotremella faginea</i>                | GM20151028           | TypeSpecies                 | Gelatinodiscaceae                 | Gelatinodiscaceae             |                                               |
| KP161274                  | <i>Asperopilum juncicola</i>               | PDD 56797            | Type Species                | Hyaloscyphaceae                   | Lachnaceae                    |                                               |
| MH578456                  | <i>Asterocalyx cf mirabilis</i>            | PDD 62628            |                             | Helotiales incertae sedis         | Helotiales incertae sedis     |                                               |
| MH578480                  | <i>Austropeziza samuelsii</i>              | ICMP 22791           | TypeSpecies                 | Arachnopezizaceae                 | Pezizellaceae                 |                                               |
| KM880187                  | <i>Banksiamyces</i> sp.                    | PDD 105253           |                             | Helotiales incertae sedis         | Helotiales incertae sedis     |                                               |
| KT598374                  | <i>Barrenia panicia</i>                    | RUTPP-WSF1R37        | exTypeSpecimen              | Helotiales incertae sedis (2)     | Mollisiaceae                  |                                               |
| KU900903                  | <i>Belonioscyphella hypnorum</i>           | Bel2 Type            | TypeSpecies                 | Helotiales incertae sedis         | Stamnaria lineage/Han Clade 9 |                                               |
| KF499363                  | <i>Bicornispora exophiala</i>              | AH 15779             | exTypeSpecimen              | Rutstroemiaceae                   | Rutstroemiaceae               |                                               |
| KF499361                  | <i>Bicornispora seditiosa</i>              | WU 32445             |                             | Rutstroemiaceae                   | Rutstroemiaceae               |                                               |
| KY462800                  | <i>Bispora antennata</i>                   | G.M. 2014-09         |                             | Helotiaceae                       | Helotiaceae                   | anamorph of <i>Bisporella</i> sensu stricto   |
| D2517                     | <i>Bivallum zelandicum</i>                 | PDD 112248           |                             | Rhytismataceae                    | Rhytismataceae                | GenBank MH921846                              |
| KY853426                  | <i>Bloxamia truncata</i>                   | FMR 11240            | TypeSpecies                 | Pezizellaceae                     | Pezizellaceae                 | Bloxamiaceae (Hernández-Restrepo et al. 2017) |
| KY653161                  | <i>Blumeria graminis</i>                   | OE2013PM31           |                             | Erysiphaceae                      | Erysiphaceae                  |                                               |
| DH_14                     | <i>Blumeria graminis hordei</i>            | DH-14                | TypeSpecies                 | Erysiphaceae                      | Erysiphaceae                  | ITS extracted from JGI genome                 |
| KY929501                  | <i>Blumeriella kerriae</i>                 | JS20160615           |                             | Drepanopezizaceae                 | Drepanopezizaceae             |                                               |
| KX858917                  | <i>Botrytis cinerea</i>                    | 1810                 | TypeSpecies                 | Sclerotiniaceae                   | Sclerotiniaceae               |                                               |
| KF727423                  | <i>Brunaudia phormigena</i>                | PDD 75309            | Type Species                |                                   | Helotiaceae                   |                                               |

| Genbank accession or code | Species                             | Voucher             | Type status of specimen (3) | Family (1, 2)                 | Accepted family                | Notes                                            |
|---------------------------|-------------------------------------|---------------------|-----------------------------|-------------------------------|--------------------------------|--------------------------------------------------|
| JN033392                  | <i>Brunnipila fuscescens</i>        | KUS F52031          |                             | Lachnaceae                    | Lachnaceae                     |                                                  |
| JX393084                  | <i>Bryoclaviculus campylopi</i>     | PDD 101074          | exTypeSpecimen              | Bryoglossum lineage           | Bryoglossum lineage            |                                                  |
| AY789285                  | <i>Bryoglossum gracile</i>          | DAOM 178087         | Type Species                | Bryoglossum lineage           | Bryoglossum lineage            |                                                  |
| KJ663831                  | <i>Bulgaria inquinans</i>           | CBS 118.31          | TypeSpecies                 | Phacidaceae                   | Phacidaceae                    |                                                  |
| MH578505                  | <i>Bulgariella pulla</i>            | ICMP 22812          | TypeSpecies                 | Helotiales incertae sedis     | Helotiaceae                    |                                                  |
| KU845537                  | <i>Bulgariella pulla</i>            | TL2011              | TypeSpecies                 | Helotiales incertae sedis     | Helotiaceae                    |                                                  |
| NR_111040                 | <i>Byssosascus striatosporus</i>    | UAMH 3572           | exTypeSpecimen              | Myxotrichaceae                | Myxotrichaceae                 |                                                  |
| AY249073                  | <i>Cadophora fastigiata</i>         | CBS 307.49          | TypeSpecies                 | Ploettnerulaceae              | Ploettnerulaceae               |                                                  |
| PRJEB13389                | <i>Cadophora malorum</i>            | Mo12                |                             | Ploettnerulaceae              | Ploettnerulaceae               | ITS extracted from NCBI genome                   |
| Cadsp1                    | <i>Cadophora</i> sp.                | DSE1049             |                             | Ploettnerulaceae              | Ploettnerulaceae               | ITS extracted from JGI genome                    |
| KF836358                  | <i>Cairneyella variabilis</i>       | VPRI 42388          | exTypeSpecimen              | incertae sedis                | Helotiales hyaloscyphoid clade |                                                  |
| KT185667                  | <i>Calloria urticae</i>             | G.M. 2015-04-12 5   |                             | Calloriaceae                  | Stamnaria lineage/Han Clade 9  |                                                  |
| JN033382                  | <i>Calycellina populina</i>         | CBS 247.62          |                             | Pezizellaceae                 | Pezizellaceae                  |                                                  |
| D1971                     | <i>Calycellina</i> sp.              | ICMP 22839          |                             | Pezizellaceae                 | Pezizellaceae                  | GenBank MH921847; ex Knightia leaves             |
| MH682235                  | <i>Calycina citrina</i>             | ICMP 22830          |                             | Pezizellaceae                 | Pezizellaceae                  |                                                  |
| LC169492                  | <i>Calycina discedens</i>           | TNS-F-37025         |                             | Pezizellaceae                 | Pezizellaceae                  |                                                  |
| JN033407                  | <i>Calycina herbarum</i>            | KUS F52362          | TypeSpecies                 | Pezizellaceae                 | Pezizellaceae                  |                                                  |
| KT185677                  | <i>Calycina marina</i>              | TROM F26093         |                             | Pezizellaceae                 | Pezizellaceae                  |                                                  |
| Bisps1                    | <i>Calycina</i> sp.                 | PMI 857             |                             | Pezizellaceae                 | Pezizellaceae                  | as Bisporella sp.; ITS extracted from JGI genome |
| LT904864                  | <i>Capitotricha bicolor</i>         | PRM 915564          | Type Species                | Lachnaceae                    | Lachnaceae                     |                                                  |
| KF033116                  | <i>Cashiella sticheri</i>           | PDD 103198          |                             | Helotiales incertae sedis     | Helotiales incertae sedis      |                                                  |
| GU727557                  | <i>Catenulifera brachyconia</i>     | CBS 700.73          |                             | Helotiales incertae sedis     | Helotiales - Han Clade 4       |                                                  |
| GU727561                  | <i>Catenulifera brevicollaris</i>   | CBS 126.74          |                             | Helotiales incertae sedis     | Helotiales - Han Clade 4       |                                                  |
| GU727560                  | <i>Catenulifera luxurians</i>       | CBS 647.75          |                             | Helotiales incertae sedis     | Helotiales - Han Clade 4       |                                                  |
| LT158425                  | <i>Cenangiosis quercicola</i>       | TAAM 178677         | TypeSpecies                 | Cenangiaceae                  | Cenangiaceae                   |                                                  |
| KX090899                  | <i>Cenangiosis</i> sp               | Dgf/C7D-02-07-14    |                             | Cenangiaceae                  | Cenangiaceae                   |                                                  |
| LT158439                  | ' <i>Cenangium</i> ' <i>acuum</i>   | TAAM 198515         |                             |                               |                                |                                                  |
| LT158444                  | <i>Cenangium ferruginosum</i>       | OULU24432           |                             | Cenangiaceae                  | Cenangiaceae                   |                                                  |
| LT158471                  | <i>Cenangium ferruginosum</i>       | TAAM 198451         | TypeSpecies                 | Cenangiaceae                  | Cenangiaceae                   |                                                  |
| LT158458                  | <i>Cenangium japonicum</i>          | CUP JA3745          |                             | Cenangiaceae                  | Cenangiaceae                   |                                                  |
| AY487082                  | <i>Chaetomella oblonga</i>          | BPI 843553          | TypeSpecies                 | Chaetomellaceae               | Chaetomellaceae                |                                                  |
| AY487085                  | <i>Chaetomella raphigera</i>        | BPI 843551          | TypeSpecies                 | Chaetomellaceae               | Chaetomellaceae                |                                                  |
| NR_145313                 | ' <i>Chalara</i> ' <i>clidemiae</i> | CBS 141319          |                             | Porodiplodiaceae (2)          | Pezizellaceae                  |                                                  |
| Chalo1                    | <i>Chalara longipes</i>             | JGI Genome          |                             |                               | Hyaloscyphaceae                | ITS extracted from JGI genome                    |
| KR611871                  | <i>Cheirospora botryospora</i>      | CPC 24605           | Type species                | Ascomycota incertae sedis (2) | Mollisiaceae                   |                                                  |
| MH682234                  | <i>Chlorencoelia torta</i>          | ICMP 22831          |                             | Cenangiaceae                  | Cenangiaceae                   | MWLR genome also available for this specimen     |
| LT158479                  | <i>Chlorencoelia versiformis</i>    | TU 119720           | Type Species                | Cenangiaceae                  | Cenangiaceae                   |                                                  |
| C_aerugascens_Hosoya      | <i>Chlorociboria aeruginascens</i>  | TNS-F-36241         |                             | Chlorociboriaceae             | Chlorociboriaceae              | Genbank LC425045                                 |
| KL247                     | <i>Chlorociboria aeruginella</i>    | TAAM 198514         |                             | Chlorociboriaceae             | Chlorociboriaceae              | GenBank MH752067                                 |
| Z81426                    | <i>Chlorociboria aeruginosa</i>     | Holst-Jensen 1785.P | Type Species                | Chlorociboriaceae             | Chlorociboriaceae              |                                                  |
| DQ491501                  | <i>Chlorociboria aeruginosa</i>     | OSC 100056          | TypeSpecies                 | Chlorociboriaceae             | Chlorociboriaceae              |                                                  |
| AY755355                  | <i>Chlorociboria halonata</i>       | PDD 71610           |                             | Chlorociboriaceae             | Chlorociboriaceae              |                                                  |
| AY755352                  | <i>Chlorociboria poutoensis</i>     | ICMP 15618          |                             | Chlorociboriaceae             | Chlorociboriaceae              |                                                  |
| D1600                     | <i>Chlorociboria</i> sp.            | ICMP 15637          |                             | Chlorociboriaceae             | Chlorociboriaceae              | GenBank MH921848                                 |
| AY755361                  | ' <i>Chlorociboria</i> ' sp.        | PDD 70096           |                             |                               |                                |                                                  |
| MG553993                  | <i>Chlorosplenium chlora</i>        | BHIF736a            | TypeSpecies                 | Helotiales incertae sedis     | Mollisiaceae                   |                                                  |
| KF429256                  | <i>Chlorovibrissea albofusca</i>    | ICMP 19443          |                             | Vibrissaceae                  | Helotiales helotioid clade     |                                                  |
| KF924737                  | <i>Chlorovibrissea bicolor</i>      | ICMP 19895          | Type Species                | Vibrissaceae                  | Helotiales helotioid clade     |                                                  |
| KF429258                  | <i>Chlorovibrissea chilensis</i>    | PDD 99891           |                             | Vibrissaceae                  | Helotiales helotioid clade     |                                                  |
| KF429261                  | <i>Chlorovibrissea phialophora</i>  | PDD 83226           |                             | Vibrissaceae                  | Helotiales helotioid clade     |                                                  |
| PRJNA289037               | <i>Ciborinia camelliae</i>          | ICMP 19812          |                             | Sclerotiniaceae               | Sclerotiniaceae                | ITS extracted from NCBI genome                   |
| Z73768                    | <i>Ciborinia whetzelii</i>          | 1927.H (Oslo)       | TypeSpecies                 | Sclerotiniaceae               | Sclerotiniaceae                |                                                  |
| JN033429                  | <i>Cistella albidolutea</i>         | KUS F52678          |                             | Hyaloscyphaceae               | Stamnaria lineage/Han Clade 9  |                                                  |
| KC834043                  | <i>Cladochasiella divergens</i>     | CCM F-13489         | exTypeSpecimen              | Ascomycota incertae sedis (2) | Discinella-Pezoloma lineage    |                                                  |
| EF029222                  | <i>Clathrosphaerina zalewskii</i>   | ICMP 15322          | TypeSpecies                 | Hyaloscyphaceae (2)           | Arachnopezizaceae              |                                                  |
| EF029202                  | <i>Clathrosporium intricatum</i>    | ICMP 14914          | TypeSpecies                 | Helotiales incertae sedis (2) | Gelatinodiscaceae              |                                                  |
| C_atro_Hosoya             | <i>Claussenomyces atrovirens</i>    | TNS-F-18149         |                             | Tympanidaceae                 | Leotiales incertae sedis       | Genbank LC425048                                 |

| Genbank accession or code | Species                        | Voucher             | Type status of specimen (3) | Family (1, 2)                 | Accepted family                | Notes                                                                                                                 |
|---------------------------|--------------------------------|---------------------|-----------------------------|-------------------------------|--------------------------------|-----------------------------------------------------------------------------------------------------------------------|
| KM677201                  | 'Clausenomyces' sp.            | ICMP 21969          |                             | Tympanidaceae                 | Leotiales incertae sedis       |                                                                                                                       |
| KC492060                  | Cleistothelobolus nigiponensis | Doveri              | Type Species                | Thelebolaceae                 | Thelebolaceae                  |                                                                                                                       |
| MH578517                  | Coccomyces crystalligenus      | PDD 111539          |                             | Rhytismataceae                | Rhytismataceae                 |                                                                                                                       |
| DQ491499                  | Coccomyces dentatus            | OSC 100021          |                             | Rhytismataceae                | Rhytismataceae                 |                                                                                                                       |
| R999                      | Coccomyces globosus            | ICMP 17374          |                             | Rhytismataceae                | Rhytismataceae                 | GenBank MH921849                                                                                                      |
| KJ606678                  | Coccomyces lauraceus           | ICMP 17399          |                             | Rhytismataceae                | Rhytismataceae                 |                                                                                                                       |
| MH578530                  | Coccomyces phyllocladi         | PDD 112232          |                             | Rhytismataceae                | Rhytismataceae                 |                                                                                                                       |
| R970                      | Coccomyces radiatus            | ICMP 17372          |                             | Rhytismataceae                | Rhytismataceae                 | GenBank MH921850                                                                                                      |
| MG386025                  | Cochlearomyces eucalypti       | CBS 142622          | exTypeSpecimen              | Cochlearomycetaceae           | Cochlearomycetaceae            |                                                                                                                       |
| NR_154804                 | Coleophoma camelliae           | CBS 101376          |                             | Leotiomyces incertae sedis    | Dermateaceae                   |                                                                                                                       |
| NR_154805                 | Coleophoma ericicola           | CBS 301.72          |                             | Leotiomyces incertae sedis    | Dermateaceae                   |                                                                                                                       |
| KU728491                  | Coleophoma paracylindrospora   | CBS 109074          |                             | Leotiomyces incertae sedis    | Dermateaceae                   |                                                                                                                       |
| NR_154807                 | Coleophoma parafusiformis      | CBS 132692          |                             | Leotiomyces incertae sedis    | Dermateaceae                   |                                                                                                                       |
| NR_111760                 | Coleophoma proteae             | CBS 132532          |                             | Leotiomyces incertae sedis    | Dermateaceae                   |                                                                                                                       |
| NR_154838                 | Coleophoma xanthosiae          | CPC 29214           |                             | Leotiomyces incertae sedis    | Dermateaceae                   |                                                                                                                       |
| NR_111443                 | Collembolispora barbata        | CBS 115944          | exTypeSpecimen              | Helotiales incertae sedis (2) | Ploettnerulaceae               |                                                                                                                       |
| GQ154575                  | 'Collophorina' paarla          | CBS 120878          |                             |                               | Leotiales incertae sedis       |                                                                                                                       |
| GQ154547                  | Collophorina rubra             | CBS 120873          | exTypeSpecimen              | Tympanidaceae                 | Tympanidaceae                  |                                                                                                                       |
| AJ293880                  | Colpoma quercinum              | strain C3           | Type Species                | Rhytismataceae                | Rhytismataceae                 |                                                                                                                       |
| KJ755499                  | Connersia rilstonii            | CBS 537.74          | exTypeSpecimen              | Pseudeurotiaceae              | Helotiaceae                    |                                                                                                                       |
| Z81428                    | Coprotinia minutula            | Holst Jensen 1916.P | Type Species                | Sclerotiniaceae               | Sclerotiniaceae                | ITS tree Lachnaceae but on long branch, ITS1 only and not great quality; also on long branch in Hosl Jensen phylogeny |
| KT225524                  | Crinula caliciiformis          | AFTOL-ID 272        | TypeSpecies                 | Tympanidaceae                 | Leotiomyces incertae sedis     |                                                                                                                       |
| KT462570                  | Cristulariella depraedans      | KUS F26976          | Type Species                | Sclerotiniaceae               | Sclerotiniaceae                |                                                                                                                       |
| 604a                      | Crocicreas gramineum           | YSU-F-03527         | TypeSpecies                 | incertae sedis                | Helotiales - Han Clade 4       | GenBank MH733945                                                                                                      |
| MH578514                  | 'Crocicreas' multicuspidatum   | PDD 112218          |                             |                               |                                |                                                                                                                       |
| LT158442                  | Crumenulopsis sororia          | TU 104504           |                             | Cenangiaceae                  | Cenangiaceae                   |                                                                                                                       |
| MH578491                  | Cryptohymenium pycnidioforum   | PDD 111534          | TypeSpecies                 | Helotiales incertae sedis     | Helotiales sclerotinioid clade |                                                                                                                       |
| KR859232                  | Cryptosporiopsis nigra         | CBS 268.39          | TypeSpecies                 | Dermateaceae                  | Dermateaceae                   |                                                                                                                       |
| EU784189                  | Cudonia circinans              | K(M)102575          | Type Species                | Cudoniaceae                   | Cudoniaceae                    |                                                                                                                       |
| DQ202512                  | Cudoniella acicularis          | CBS 100273          |                             | Helotiaceae                   | Helotiaceae                    |                                                                                                                       |
| DQ491502                  | Cudoniella clavus              | AFTOL-ID 166        |                             | Helotiaceae                   | Helotiaceae                    |                                                                                                                       |
| DQ202513                  | Cudoniella indica              | CBS 430.94          |                             | Helotiaceae                   | Helotiaceae                    |                                                                                                                       |
| DQ202505                  | Cudoniella indica              | SS 708              |                             | Helotiaceae                   | Helotiaceae                    |                                                                                                                       |
| KM503089                  | Curviclavula anemophila        | CBS 138123          | exTypeSpecimen              | Helotiales incertae sedis (2) | Peizellaceae                   |                                                                                                                       |
| AJ430397                  | Cyathicula coronata            | ARON3093.H          | TypeSpecies                 | Helotiaceae                   | Helotiaceae                    |                                                                                                                       |
| NR_153910                 | Cyclaneusma minus              | CBS 496.73          | exTypeSpecimen              | Marthamycetaceae              | Marthamycetaceae               |                                                                                                                       |
| EU107253                  | Cyttaria darwinii              | isolate 14 (Farlow) | TypeSpecies                 | Cyttariaceae                  | Cyttariaceae                   |                                                                                                                       |
| U92302                    | Darkera parca                  | Gernandt            | exTypeSpecimen              | Phacidiaceae                  | Phacidiaceae                   |                                                                                                                       |
| AB481239                  | Dasyyscyphella longistipitata  | FC-2013             |                             | Lachnaceae                    | Lachnaceae                     |                                                                                                                       |
| NR_154008                 | Davidhawksworthia ilicicola    | CBS 734.94          | exTypeSpecimen              | Dermateaceae                  | Dermateaceae                   |                                                                                                                       |
| JQ688406                  | Deltopyxis triangulispota      | Baral HB9625b       | exTypeSpecimen              | Leotiomyces incertae sedis    | Leotiomyces incertae sedis     |                                                                                                                       |
| HF677177                  | Dematiocypha delicatum         | FMR 11585           |                             | cf Hyaloscyphaceae            | Helotiales - Han Clade 7       |                                                                                                                       |
| JN033438                  | Dematiocypha dematiicola       | TNS-F-17834         | type species                | cf Hyaloscyphaceae            | Helotiales - Han Clade 7       |                                                                                                                       |
| PDD102323                 | 'Dermatea' fumosa              | PDD 102323          |                             |                               |                                | GenBank MH921851                                                                                                      |
| AF141164                  | Dermea acerina                 | CBS 131.68          |                             | Dermateaceae                  | Dermateaceae                   |                                                                                                                       |
| AF141159                  | Dermea cerasi                  | CBS 136.46          | TypeSpecies                 | Dermateaceae                  | Dermateaceae                   |                                                                                                                       |
| KF727411                  | Dicephalospora chrysotricha    | ICMP 19952          |                             | Helotiaceae                   | Helotiaceae                    |                                                                                                                       |
| 10106                     | Dicephalospora rufocornea      | HMAS 275559         |                             | Helotiaceae                   |                                | GenBank KU668565                                                                                                      |
| AB926055                  | Dicephalospora rufocornea      | TNS-F-40024         |                             | Helotiaceae                   | Helotiaceae                    |                                                                                                                       |
| D2146                     | 'Dicephalospora rufo-cornea'   | ICMP 22840          |                             |                               |                                | GenBank MH921852; ex Phormium ex New Zealand                                                                          |
| DQ202518                  | Dimorphospora foliicola        | CBS 221.59          | exTypeSpecimen              | Helotiaceae (2)               | Gelatinodiscaceae              |                                                                                                                       |
| KY672995                  | Diplocarpon mali               | NL1                 |                             | Drepanopezizaceae             | Drepanopezizaceae              | NCBI genome also available for this specimen; as Marsonnina coronariae                                                |
| DortE4                    | Diplocarpon rosae              | DortE4              | TypeSpecies                 | Drepanopezizaceae             | Drepanopezizaceae              | ITS extracted from NCBI genome                                                                                        |
| KP052773                  | Diplocarpon rosae              | DR19                | TypeSpecies                 | Drepanopezizaceae             | Drepanopezizaceae              |                                                                                                                       |
| KJ559532                  | Diplolaeiopsis cf ranula       | Diederich 16989     | Type Species                | Cordieritidaceae              | Cordieritidaceae               |                                                                                                                       |
| KC412001                  | Discinella boudieri            | Baral HB4326        | TypeSpecies                 | Discinella-Pezoloma lineage   | Discinella-Pezoloma lineage    |                                                                                                                       |

| Genbank accession or code | Species                                              | Voucher           | Type status of specimen (3) | Family (1, 2)                    | Accepted family                | Notes                                          |
|---------------------------|------------------------------------------------------|-------------------|-----------------------------|----------------------------------|--------------------------------|------------------------------------------------|
| KY462820                  | <i>Duebenia compta</i>                               | G.M. 2015-06-01-1 |                             | Calloriaceae                     | Stamnaria lineage/Han Clade 9  |                                                |
| AB516665                  | <i>Dumontinia tuberosa</i>                           | MAFF 241373       | TypeSpecies                 | Sclerotiniaceae                  | Sclerotiniaceae                |                                                |
| KY462811                  | <i>Durella connivens</i>                             | GM-2015-05-16     |                             | Strossmayeria lineage            | Strossmayeria lineage          |                                                |
| KY462812                  | ' <i>Durella</i> ' <i>macrospora</i>                 | Baral HB9974      |                             |                                  |                                |                                                |
| MF161317                  | ' <i>Durella</i> ' <i>melanochlora</i>               | BHI-F652a         |                             |                                  |                                |                                                |
| NR_126148                 | <i>Eleutheromyces subulatus</i>                      | CBS 113.86        | exTypeSpecimen              | Helicogoniaceae                  | Helicogoniaceae                | epitype (MBT178280)                            |
| LT158475                  | <i>Elliottinia kernerii</i>                          | TU 104529         | Type Species                | Sclerotiniaceae                  | Sclerotiniaceae                |                                                |
| AF203469                  | <i>Elytroderma deformans</i>                         | CBS 181.68        | Type Species                | Rhytismataceae                   | Rhytismataceae                 |                                                |
| KL111                     | <i>Encoelia fimbriata</i>                            | TAAM 165728       | TypeSpecies                 | Cordieriticeae                   | Cordieriticeae                 | GenBank MH752063                               |
| LT158416                  | <i>Encoelia furfuracea</i>                           | TAAM 165633       |                             | Cenangiaceae                     | Cordieriticeae                 |                                                |
| LT158438                  | <i>Encoelia glauca</i>                               | Baral HB9232      |                             | Encoeliaceae                     | Cordieriticeae                 |                                                |
| LT158462                  | ' <i>Encoelia</i> ' <i>pruinosa</i>                  | NY02533482        |                             |                                  |                                | KL344                                          |
| KF727424                  | <i>Endoscypha perforans</i>                          | PDD 102231        | Type Species                | Hyaloscyphaceae                  | Helotiaceae                    |                                                |
| KY661614                  | <i>Epicladonia sandstedei</i>                        | RP106             | Type Species                | Ascomycota incertae sedis (2)    | Phaciaceae                     |                                                |
| KX501126                  | <i>Eriopezia caesia</i>                              | SBRH 843          | Type Species                | Arachnopezizaceae                | Arachnopezizaceae              |                                                |
| KP794929                  | <i>Erysiphe lespedezae</i>                           | CFSZ 95119        |                             | Erysiphaceae                     | Erysiphaceae                   |                                                |
| KY660860                  | <i>Erysiphe necator</i>                              | 4_74              |                             | Erysiphaceae                     | Erysiphaceae                   |                                                |
| U92304                    | <i>Fabrella tsugae</i>                               | Gernandt          | TypeSpecies                 | Cenangiaceae                     | Cenangiaceae                   |                                                |
| CCM_F00681                | <i>Filosporella annelidica</i>                       | CCM F-00681       |                             | Ascomycota incertae sedis (2)    | Helotiales incertae sedis      | GenBank MK226458                               |
| KC834047                  | <i>Filosporella fistucella</i>                       | CCM F-13091       |                             | Ascomycota incertae sedis (2)    | Helotiales incertae sedis      |                                                |
| KC834050                  | <i>Flagellospora curvula</i>                         | CCM F-18699       | TypeSpecies                 | Nectriaceae (2)                  | Leotiales incertae sedis       |                                                |
| KP234354                  | <i>Fontanospora eccentrica</i>                       | CCM F-11513       | TypeSpecies                 | Helotiales incertae sedis (2)    | Discinella-Pezoloma lineage    |                                                |
| KF730813                  | <i>Fontanospora eccentrica</i>                       | UMB 882.11        | Type Species                | Helotiales incertae sedis (2)    | Discinella-Pezoloma lineage    |                                                |
| DQ195779                  | <i>Fulvoflamma eucalypti</i>                         | CPC 11243         | exTypeSpecimen              | Rhytismatales incertae sedis (2) | Phaciaceae                     |                                                |
| KY853444                  | <i>Fuscosclera lignicola</i>                         | FMR11236          | exTypeSpecimen              | Dermateaceae (2)                 | Mollisiaceae                   |                                                |
| PRJNA407395               | <i>Gamarada debraloekiae</i>                         | T669              | TypeSpecies                 |                                  | Helotiales - Han Clade 4       | ITS extracted from NCBI genome                 |
| G_ast_Hosoya              | <i>Gelatinipulvinella astraeicola</i>                | TNS-F-17846       | TypeSpecies                 | Helicogoniaceae                  | Helicogoniaceae                | Genbank LC425040                               |
| EU652349                  | <i>Gelatinodiscus flavidus</i>                       | OSC 65796         | Type Species                | Gelatinodiscaceae                | Gelatinodiscaceae              |                                                |
| JX219380                  | <i>Gelatinomyces siamensis</i>                       | KKUK2             | exTypeSpecimen              | Tympanidaceae                    | Leotiales incertae sedis       | synonym of Myriodiscus (Baral 2015)            |
| G_fung_Hosoya             | <i>Gelatinopsis fungicola</i>                        | TNS-F-44003       |                             | Helicogoniaceae                  | Helicogoniaceae                | Genbank LC425051                               |
| KJ59542                   | <i>Geltingia associata</i>                           | TU 45655          | Type Species                | Helicogoniaceae                  | Helicogoniaceae                |                                                |
| KX501127                  | <i>Gemmina gemmarum</i>                              | SBRH 862          | Type Species                | Pezizellaceae                    | Pezizellaceae                  |                                                |
| NR_111872                 | <i>Geomyces auratus</i>                              | CBS 108.14        | exTypeSpecimen              | Pseudeurotiaceae                 | Pseudeurotiaceae               |                                                |
| NR_137138                 | <i>Glarea lozoyensis</i>                             | ATCC 20868        | exTypeSpecimen              | Helotiaceae                      | Helotiaceae                    | JGI genome also available for this specimen    |
| DQ235697                  | <i>Gloetotinia temulenta</i>                         | GS01              | TypeSpecies                 | Helotiaceae                      | Helotiales incertae sedis      |                                                |
| KL150                     | <i>Godronia fuliginosa</i>                           | Baral HB6640      |                             | Godroniaceae                     | Godroniaceae                   | GenBank MH752064                               |
| AB077679                  | <i>Golovinomyces ambrosiae</i>                       | MUMH731           |                             | Erysiphaceae                     | Erysiphaceae                   |                                                |
| AB769417                  | <i>Golovinomyces asterum</i> var. <i>solidaginis</i> | MUMH941           |                             | Erysiphaceae                     | Erysiphaceae                   |                                                |
| AB077685                  | <i>Golovinomyces macrocarpus</i>                     | MUMH864           |                             | Erysiphaceae                     | Erysiphaceae                   |                                                |
| KC834058                  | <i>Gorgomyces hungaricus</i>                         | CCM F-12696       | exTypeSpecimen              | Ascomycota incertae sedis (2)    | Leotiales incertae sedis       |                                                |
| JQ256423                  | <i>Graddonia coracina</i>                            | ILLS 60491        | TypeSpecies                 | Helotiaceae                      | Helotiaceae                    |                                                |
| KC352953                  | <i>Gremmeniella abietina</i>                         | DAOM 170387       | Type Species                | Godroniaceae                     | Godroniaceae                   |                                                |
| Greab                     | <i>Gremmeniella abietina</i>                         | DAOM 170408       | TypeSpecies                 | Godroniaceae                     | Godroniaceae                   | GenBank KC352960                               |
| KX358851                  | <i>Grovesiella abieticola</i>                        | RFap2016WA 2      | Type Species                | Tympanidaceae                    | Godroniaceae                   |                                                |
| KC460209                  | <i>Grovesinia moricola</i>                           | KUS F26901        |                             | Sclerotiniaceae                  | Sclerotiniaceae                |                                                |
| Z81433                    | <i>Grovesinia pyramidalis</i>                        | LMK38             | TypeSpecies                 | Sclerotiniaceae                  | Sclerotiniaceae                |                                                |
| NR_111199                 | <i>Gymnostellatospora canadensis</i>                 | UAMH 8899         |                             | Myxotrichaceae                   | Pseudeurotiaceae               |                                                |
| NR_111200                 | <i>Gymnostellatospora frigida</i>                    | UAMH 9304         |                             | Myxotrichaceae                   | Pseudeurotiaceae               |                                                |
| KC834061                  | <i>Gyoerffyyella rotula</i>                          | CCM F-400         | TypeSpecies                 | Discinella-Pezoloma lineage      | Discinella-Pezoloma lineage    | type status, Marvanova, TBMS 65: 555-565, 1975 |
| AF169303                  | <i>Halenospora varia</i>                             | ATCC 28878        | TypeSpecies                 | Leotiaceae (2)                   | Helotiaceae                    | as <i>Zalerion varium</i>                      |
| JN033455                  | <i>Hamatocanthoscypha laricinis</i>                  | TNS-F-24336       | type species                | Pezizellaceae                    | Pezizellaceae                  |                                                |
| D2116                     | <i>Hamatocanthoscypha</i> sp.                        | ICMP 22841        |                             | Pezizellaceae                    | Pezizellaceae                  | GenBank MH921853                               |
| AB329720                  | <i>Haradamyces foliicola</i>                         | MAFF 411026       | exTypeSpecimen              | Sclerotiniaceae                  | Sclerotiniaceae                |                                                |
| KR078433                  | <i>Helicocentralis hyalina</i>                       | S504733.01        | exTypeSpecimen              | Leotiomycetes incertae sedis (2) | Helotiales hyaloscyphoid clade |                                                |
| EF029238                  | ' <i>Helicodendron</i> ' <i>luteoalbum</i>           | ICMP 15709        |                             |                                  |                                |                                                |
| KR078436                  | <i>Helicodendron paradoxum</i>                       | CBS 300.50        | Type Species                | Helotiales incertae sedis (2)    | Gelatinodiscaceae              |                                                |
| EF029223                  | <i>Helicodendron paradoxum</i>                       | ICMP 15323        | TypeSpecies                 | Helotiales incertae sedis (2)    | Gelatinodiscaceae              |                                                |

| Genbank accession or code | Species                                 | Voucher           | Type status of specimen (3) | Family (1, 2)                 | Accepted family              | Notes                                                  |
|---------------------------|-----------------------------------------|-------------------|-----------------------------|-------------------------------|------------------------------|--------------------------------------------------------|
| EF029195                  | 'Helicodendron' tubulosum               | ICMP 14615        |                             |                               |                              |                                                        |
| EF029197                  | 'Helicodendron' websteri                | ICMP 14766        |                             |                               |                              |                                                        |
| EF029196                  | 'Helicodendron' westerdijkiae           | ICMP 14616        |                             |                               |                              |                                                        |
| MH682236                  | Helotiales sp                           | ICMP 22837        |                             |                               |                              |                                                        |
| EU440381                  | Helotiales ex Damnamenia                | PDD 93520         |                             |                               |                              |                                                        |
| KT876979                  | Helotiales sp.                          | Baral HB9934a     |                             |                               |                              |                                                        |
| D2515                     | Helotiales sp.                          | PDD 112247        |                             |                               |                              | GenBank MH921854; tiny blue green on Dracophyllum leaf |
| MH578568                  | 'Helotium' elaeocarpi                   | ICMP 22808        |                             |                               |                              |                                                        |
| KY462819                  | 'Helotium' uvidulum                     | G.M. 2015-06-06-1 |                             |                               |                              |                                                        |
| KY462821                  | Heterosphaeria patella                  | G.M. 201408041    | TypeSpecies                 | Heterosphaeriaceae            | Heterosphaeriaceae           |                                                        |
| AY789297                  | Heyderia abietis                        | HMAS 71954        | Type Species                | Cenangiaceae                  | Cenangiaceae                 |                                                        |
| AY789290                  | Heyderia abietis                        | OSC 60392         | Type Species                | Cenangiaceae                  | Cenangiaceae                 |                                                        |
| LT158426                  | Heyderia abietis                        | TAAM 165961       | TypeSpecies                 | Cenangiaceae                  | Cenangiaceae                 |                                                        |
| LT158430                  | Heyderia pusilla                        | TU 104257         |                             | Cenangiaceae                  | Cenangiaceae                 |                                                        |
| Au09_2                    | Hispidula sp.                           | ICMP 22842        |                             | Hyaloscyphaceae               | Helotiaceae                  | GenBank MH921855; on Dicksonia                         |
| Au09_41                   | Hispidula sp.                           | ICMP 22843        |                             | Hyaloscyphaceae               | Helotiaceae                  | GenBank MH921856; on Nothofagus                        |
| MH578493                  | Hispidula tokerau                       | ICMP 22800        |                             | incertae sedis                | Helotiaceae                  |                                                        |
| H_muc_Hosoya              | Holwaya mucida                          | TNS-F-29145       | TypeSpecies                 | Tympanidaceae                 | Leotiomycetes incertae sedis | GenBank LC425042                                       |
| TU112863                  | Holwaya mucida                          | TU 112863         | TypeSpecies                 | Tympanidaceae                 | Leotiomycetes incertae sedis | GenBank MH752062                                       |
| EU040232                  | Hyalodendriella betulae                 | CBS 261.82        | exTypeSpecimen              | Helotiales incertae sedis (2) | Pezizellaceae                |                                                        |
| JN033416                  | Hyalopeziza leuconica                   | KUS F52474        |                             | Hyaloscyphaceae               | Hyaloscyphaceae              |                                                        |
| JN033381                  | Hyalopeziza nectrioides                 | CBS 597.77        |                             | Hyaloscyphaceae               | Hyaloscyphaceae              |                                                        |
| JN033439                  | Hyalopeziza sp                          | TNS-F-17879       |                             | Hyaloscyphaceae               | Hyaloscyphaceae              |                                                        |
| JN033442                  | Hyalopeziza sp                          | TNS-F-17975       |                             | Hyaloscyphaceae               | Hyaloscyphaceae              |                                                        |
| JN033449                  | Hyalopeziza sp                          | TNS-F-18048       |                             | Hyaloscyphaceae               | Hyaloscyphaceae              |                                                        |
| JN033437                  | Hyaloscypha albohyalina var albohyalina | TNS-F-11213       |                             | Hyaloscyphaceae               | Hyaloscyphaceae              |                                                        |
| JN033456                  | Hyaloscypha albohyalina var monodictys  | TNS-F-5013        |                             | Hyaloscyphaceae               | Hyaloscyphaceae              |                                                        |
| JN033426                  | Hyaloscypha albohyalina var spiralis    | KUS F52652        |                             | Hyaloscyphaceae               | Hyaloscyphaceae              |                                                        |
| JN033394                  | Hyaloscypha aureliella                  | KUS F52070        |                             | Hyaloscyphaceae               | Hyaloscyphaceae              |                                                        |
| EU940230                  | Hyaloscypha fockelii                    | TUR 172135        |                             | Hyaloscyphaceae               | Hyaloscyphaceae              |                                                        |
| JN943614                  | Hyaloscypha hepaticicola                | M339              |                             | Hyaloscyphaceae               | Hyaloscyphaceae              |                                                        |
| JN033451                  | Hyaloscypha leuconica var. bulbopilosa  | TNS-F-18073       |                             | Hyaloscyphaceae               | Hyaloscyphaceae              |                                                        |
| KY769526                  | Hyaloscypha minuta                      | G.M. 20150406.2   | TypeSpecies                 | Hyaloscyphaceae               | Hyaloscyphaceae              |                                                        |
| TTT2178                   | Hyaloscypha sp.                         | ICMP 22844        |                             | Hyaloscyphaceae               | Hyaloscyphaceae              | GenBank MH921857                                       |
| JN033378                  | Hyaloscypha vitreola                    | CBS 127.91        |                             | Hyaloscyphaceae               | Hyaloscyphaceae              |                                                        |
| FJ477059                  | Hyaloscypha vitreola                    | Huhtinen M220     | TypeSpecies                 | Hyaloscyphaceae               | Hyaloscyphaceae              |                                                        |
| KC834062                  | Hydrocina chaetocladia                  | CCM F-10890       | exTypeSpecimen              | Discinella-Pezoloma lineage   | Helotiales incertae sedis    |                                                        |
| NR_154907                 | 'Hymenoscyphus' aurantiacus             | HMAS 264143       |                             |                               | Helotiaceae                  |                                                        |
| AB926065                  | Hymenoscyphus caudatus                  | TNS-F-40056       |                             | Helotiaceae                   | Helotiaceae                  |                                                        |
| CBS133217                 | Hymenoscyphus fraxineus                 | CBS 133217        |                             | Helotiaceae                   | Helotiaceae                  | ITS extracted from NCBI genome                         |
| GU586933                  | Hymenoscyphus fructigenus               | CBS 650.92        | TypeSpecies                 | Helotiaceae                   | Helotiaceae                  |                                                        |
| AB926057                  | Hymenoscyphus fructigenus               | TNS-F-44644       | TypeSpecies                 | Helotiaceae                   | Helotiaceae                  |                                                        |
| NR_119669                 | Hymenoscyphus ginkgonis                 | KUS F51352        |                             | Helotiaceae                   | Helotiaceae                  |                                                        |
| NR_137108                 | 'Hymenoscyphus' haasticus               | ICMP 19598        |                             | Helotiaceae                   | Helotiaceae                  |                                                        |
| CBS122016                 | Hymenoscyphus infarciens                | CBS 122016        |                             | Helotiaceae                   | Helotiaceae                  | ITS extracted from NCBI genome                         |
| NR_137110                 | 'Hymenoscyphus' kiko                    | ICMP 19613        |                             | Helotiaceae                   | Helotiaceae                  |                                                        |
| AB926063                  | Hymenoscyphus menthae                   | TNS-F-40052       |                             | Helotiaceae                   | Helotiaceae                  |                                                        |
| D1039                     | 'Hymenoscyphus' metrosideri             | ICMP 22845        |                             |                               |                              | GenBank MH921858                                       |
| NR_137109                 | 'Hymenoscyphus' ohakune                 | ICMP 19601        |                             | Helotiaceae                   |                              |                                                        |
| PRJNA297738               | 'Hymenoscyphus' repandus                | CBS 341.76        |                             |                               |                              | ITS extracted from NCBI genome                         |
| CBS111550                 | Hymenoscyphus salicellus                | CBS 111550        |                             | Helotiaceae                   | Helotiaceae                  | ITS extracted from NCBI genome                         |
| KC481695                  | Hymenoscyphus scutula                   | CBS 480.97        |                             | Helotiaceae                   | Helotiaceae                  | NCBI genome also available for this specimen           |
| AB926114                  | Hymenoscyphus scutula                   | TNS-F-17507       |                             | Helotiaceae                   | Helotiaceae                  |                                                        |
| AB481291                  | 'Hymenoscyphus' varicosporoides         | FC-2038           |                             | Helotiaceae                   |                              |                                                        |
| Hymvar1                   | 'Hymenoscyphus' varicosporoides         | Hymvar1           |                             | Helotiaceae                   |                              | ITS extracted from JGI genome                          |
| KC164666                  | 'Hymenoscyphus' waikaia                 | PDD 66379         |                             | Helotiaceae                   |                              |                                                        |
| MH578484                  | Hymenotorendiella dingleyae             | ICMP 22793        |                             | Helotiaceae                   | Helotiaceae                  | NCBI genome also available for this specimen           |

| Genbank accession or code | Species                       | Voucher              | Type status of specimen (3) | Family (1, 2)                    | Accepted family               | Notes                                        |
|---------------------------|-------------------------------|----------------------|-----------------------------|----------------------------------|-------------------------------|----------------------------------------------|
| MH578483                  | Hymenotorrendiella eucalypti  | ICMP 22792           | TypeSpecies                 | Helotiaceae                      | Helotiaceae                   |                                              |
| AB546944                  | Hypodiscus hyaloscyphoides    | TNS-F-13588          |                             | Hyaloscyphaceae                  | Helotiales - Han Clade 4      |                                              |
| MH682230                  | Hypodiscus sp.                | ICMP 22833           |                             | Hyaloscyphaceae                  | Helotiales - Han Clade 4      | NCBI genome also available for this specimen |
| AB546953                  | Hypodiscus theioides          | TNS-F-32000          | Type Species                | Hyaloscyphaceae                  | Helotiales - Han Clade 4      |                                              |
| JN033448                  | Hypopeziza pygmaea            | TNS-F-17940          |                             | Hyaloscyphaceae                  | Helotiales - Han Clade 4      |                                              |
| MH682238                  | Hypoderma cordyline           | ICMP 22834           |                             | Rhytismataceae                   | Rhytismataceae                |                                              |
| R898                      | Hypoderma liliense            | ICMP 18323           |                             | Rhytismataceae                   | Rhytismataceae                | GenBank MH921859                             |
| JF683419                  | Hypoderma rubi                | ICMP 17339           | TypeSpecies                 | Rhytismataceae                   | Rhytismataceae                |                                              |
| KT876985                  | Incrucipulum ciliare          | Baral HB9922         | TypeSpecies                 | Lachnaceae                       | Lachnaceae                    |                                              |
| AB481261                  | Incrucipulum radiatum         | FC-2283, TNS-F-16769 |                             | Lachnaceae                       | Lachnaceae                    |                                              |
| KR859078                  | Infundichalara microchona     | CBS 175.74           | exTypeSpecimen              | Helotiales incertae sedis (2)    | Pezizellaceae                 |                                              |
| KL154                     | Ionomidotis irregularis       | TAAM 198520          | TypeSpecies                 | Cordieriticeae                   | Cordieriticeae                | GenBank MH752065                             |
| KL301                     | Ionomidotis olivascens        | TNS-F-39269          |                             | Cordieriticeae                   | Cordieriticeae                | GenBank MH752068                             |
| AY236423                  | Kohninia linnaeicola          | ARON 3886            | TypeSpecies                 | Sclerotiniaceae                  | Sclerotiniaceae               |                                              |
| MH578545                  | Lachnellula rhopalostylidis   | ICMP 22817           |                             | Lachnaceae                       | Lachnaceae                    |                                              |
| AB481247                  | Lachnellula subtilissima      | FC 2354              |                             | Lachnaceae                       | Lachnaceae                    |                                              |
| NR_154125                 | Lachnopsis catarinensis       | CPC 24723            | exTypeSpecimen              | Hyaloscyphaceae                  | Lachnaceae                    |                                              |
| JN033395                  | Lachnum abnorme               | KUS F52080           |                             | Lachnaceae                       | Lachnaceae                    |                                              |
| D2142                     | Lachnum bergrenii             | ICMP 22847           |                             | Lachnaceae                       | Lachnaceae                    | GenBank MH921860                             |
| D2179                     | Lachnum filiceum              | ICMP 22848           |                             | Lachnaceae                       | Lachnaceae                    | GenBank MH921861                             |
| MH682233                  | Lachnum nothofagi             | ICMP 22835           |                             | Lachnaceae                       | Lachnaceae                    | NCBI genome also available for this specimen |
| L_palm_Hosoya             | Lachnum palmae                | TNS-F-13500          |                             | Lachnaceae                       | Lachnaceae                    | GenBank LC425039                             |
| D832                      | Lachnum palmae                | ICMP 22849           |                             | Lachnaceae                       | Lachnaceae                    | GenBank MH921862                             |
| D2018asc1                 | Lachnum pteridicola           | ICMP 22850           |                             | Lachnaceae                       | Lachnaceae                    | GenBank MH921863                             |
| D1189                     | Lachnum pteridophyllum        | ICMP 22851           |                             | Lachnaceae                       | Lachnaceae                    | GenBank MH921864                             |
| MH578538                  | Lachnum sp.                   | ICMP 22822           |                             | Lachnaceae                       | Lachnaceae                    | ex Dacrydium cupressinum                     |
| DQ491485                  | Lachnum virgineum             | AFTOL-ID 49          |                             | Lachnaceae                       | Lachnaceae                    |                                              |
| AB705235                  | Lachnum virgineum             | FC 2137              |                             | Lachnaceae                       | Lachnaceae                    |                                              |
| MH578513                  | 'Lachnum' willisii            | PDD 112217           |                             |                                  |                               |                                              |
| KT185666                  | Laetinaevia carneoflavida     | G.M. 2014-07-25      |                             | Calloriaceae                     | Stamnaria lineage/Han Clade 9 |                                              |
| L_brun_Hosoya             | 'Lambertella' brunneola       | TNS-F-44244          |                             | Rutstroemiaceae                  | Rutstroemiaceae               | GenBank LC425046                             |
| AB926069                  | Lambertella cornimaris        | TNS-F-40083          | TypeSpecies                 | Rutstroemiaceae                  | Rutstroemiaceae               |                                              |
| D1109                     | Lambertella corni-marais      | ICMP 22852           | TypeSpecies                 | Rutstroemiaceae                  | Rutstroemiaceae               | GenBank MH921865                             |
| AB926081                  | Lambertella pyrolae           | TNS-F-40132          |                             | Rutstroemiaceae                  | Rutstroemiaceae               |                                              |
| KF545329                  | Lambertella subrenispora      | CBS 811.85           |                             | Rutstroemiaceae                  | Rutstroemiaceae               |                                              |
| AY755334                  | Lanzia allantospora           | ICMP 22836           |                             | Rutstroemiaceae                  | Rutstroemiaceae               |                                              |
| MH137197                  | Lanzia griseliniae            | ICMP 20108           |                             | Rutstroemiaceae                  | Rutstroemiaceae               |                                              |
| MH578497                  | 'Lanzia' ovispora             | ICMP 22804           |                             |                                  |                               |                                              |
| KX228287                  | Lareunionomyces syzygii       | CPC 26531            | exTypeSpecimen              | Neolauriomycetaceae (2)          | Helotiales pezizelloid clade  |                                              |
| AB481284                  | Lasiobolium lonicerae         | FC 2270              |                             | Lachnaceae                       | Lachnaceae                    |                                              |
| NR_137151                 | Lauriomycetes bellulus        | CBS 517.93           |                             | Lauriomycetaceae                 | Lauriomycetaceae              |                                              |
| NR_155326                 | Lauriomycetes cylindricus     | BCC 18576            |                             | Lauriomycetaceae                 | Lauriomycetaceae              |                                              |
| NR_155327                 | Lauriomycetes ellipticus      | BCC 4007             |                             | Lauriomycetaceae                 | Lauriomycetaceae              |                                              |
| KX649976                  | 'Lauriomycetes' sakaeratensis | SFC 01642            |                             |                                  |                               |                                              |
| CCM_F21799                | Lemonnieria aquatica          | CCM F-21799          | TypeSpecies                 | incertae sedis                   | Discinella-Pezoloma lineage   | GenBank MK226460                             |
| NR_121306                 | Leohumicola verrucosa         | CBS 115880           | exTypeSpecimen              | Leotiomycetes incertae sedis (2) | Stamnaria lineage/Han Clade 9 |                                              |
| EU784369                  | Leotia lubrica                | K(M)67114            | Type Species                | Leotiaceae                       | Leotiaceae                    |                                              |
| DQ491484                  | Leotia lubrica                | OSC 100001           | TypeSpecies                 | Leotiaceae                       | Leotiaceae                    |                                              |
| AY129285                  | Leptodontidium elatius        | CBS 329.53           | exTypeSpecimen              | Helotiales incertae sedis (2)    | Helotiales - Han Clade 4      |                                              |
| AY354250                  | Leptodontidium elatius        | olrim127 1           |                             | Helotiales incertae sedis (2)    | Helotiales - Han Clade 4      |                                              |
| DQ069032                  | 'Leptodontidium' orchidicola  | aurim605             |                             |                                  |                               |                                              |
| MG597459                  | Leptodontidium sp.            | isolate 0242         |                             | Helotiales incertae sedis (2)    | Helotiales - Han Clade 4      |                                              |
| KY031672                  | 'Leptodontidium' sp.          | MR80                 |                             |                                  |                               |                                              |
| KF049206                  | Leuconeurospora pulcherrima   | AFTOL-ID 1397        | exTypeSpecimen              | Pseudeurotiaceae                 | Pseudeurotiaceae              |                                              |
| JX270336                  | Leuconeurospora sp            | 01NH01               |                             | Pseudeurotiaceae                 | Pseudeurotiaceae              |                                              |
| R870                      | Lophodermium agathidis        | ICMP 17348           |                             | Rhytismataceae                   | Rhytismataceae                | GenBank MH921866                             |
| KF727414                  | Lophodermium conigenum        | PDD 103381           |                             | Rhytismataceae                   | Rhytismataceae                |                                              |

| Genbank accession or code | Species                     | Voucher               | Type status of specimen (3) | Family (1, 2)                    | Accepted family             | Notes                                                     |
|---------------------------|-----------------------------|-----------------------|-----------------------------|----------------------------------|-----------------------------|-----------------------------------------------------------|
| EF191235                  | Lophodermium eucalypti      | ICMP 16796            |                             | Rhytismataceae                   | Rhytismataceae              |                                                           |
| MH578524                  | Lophodermium hauturuuanum   | PDD 112227            |                             | Rhytismataceae                   | Rhytismataceae              |                                                           |
| MH578540                  | Lophodermium rectangulare   | PDD 112235            |                             | Rhytismataceae                   | Rhytismataceae              |                                                           |
| R927                      | Lophodermium tindalii       | ICMP 17357            |                             | Rhytismataceae                   | Rhytismataceae              | GenBank MH921867                                          |
| NR_138379                 | Loramycetes macrosporus     | CBS 235.53            |                             | Loramycetaceae                   | Mollisiaceae                | JGI genome also available for this specimen               |
| KP984784                  | Macroscyttea parmotrematis  | UGDA                  | exTypeSpecimen              | Helotiales incertae sedis (2)    | Cordieritidaceae            |                                                           |
| MH037296                  | Malbranchea flavorosea      | ATCC 34529            |                             | Myxotrichaceae                   | Myxotrichaceae              |                                                           |
| Marbr1                    | Marssonina brunnea          | Marbr1                |                             | Drepanopezizaceae                | Drepanopezizaceae           | ITS extracted from JGI genome                             |
| Au97_130                  | Marthamycetes barbatus      | ICMP 22853            |                             | Marthamycetaceae                 | Marthamycetaceae            | GenBank MH921868                                          |
| MH682228                  | Marthamycetes dracophylli   | ICMP 22838            |                             | Marthamycetaceae                 | Marthamycetaceae            |                                                           |
| Au97_123                  | Marthamycetes emarginatus   | ICMP 22854            | TypeSpecies                 | Marthamycetaceae                 | Marthamycetaceae            | GenBank MH921869; ex Eucalyptus Australia; type substrate |
| Au96_140                  | Marthamycetes gilvus        | ICMP 22855            |                             | Marthamycetaceae                 | Marthamycetaceae            | GenBank MH921870                                          |
| MH682227                  | Marthamycetes sp.           | ICMP 17398            |                             | Marthamycetaceae                 | Marthamycetaceae            | ex Metrosideros, New Zealand                              |
| NR_126150                 | Mastigosporium album        | CBS 138013            | exTypeSpecimen              | Ascomycota incertae sedis (2)    | Ploettnerulaceae            |                                                           |
| GQ406809                  | Medeolaria farlowii         | DHP 07-637            | Type Species                | Medeolariaceae                   | Medeolariaceae              |                                                           |
| Melbi2                    | Meliniomyces bicolor        | Melbi2                |                             | Hyaloscyphaceae                  | Hyaloscyphaceae             | ITS extracted from JGI genome                             |
| Melva1                    | Meliniomyces variabilis     | Melva1                | TypeSpecies                 | Hyaloscyphaceae                  | Hyaloscyphaceae             | ITS extracted from JGI genome                             |
| NR_121313                 | Meliniomyces variabilis     | UAMH 8861             | exTypeSpecimen              | Hyaloscyphaceae                  | Hyaloscyphaceae             |                                                           |
| KY485137                  | Meloderma desmazierii       | DAOM 89807            | Type Species                | Rhytismataceae                   | Rhytismataceae              |                                                           |
| R239                      | 'Meloderma' dracophylli     | ICMP 17343            |                             | Rhytismataceae                   | Rhytismataceae              | GenBank MH921871                                          |
| KT225534                  | Meria laricis               | CBS 298.52            | TypeSpecies                 | Cenangiaceae                     | Cenangiaceae                |                                                           |
| EU784373                  | Microglossum olivaceum      | K(M)135599            | TypeSpecies                 | Leotiaceae                       | Leotiaceae                  |                                                           |
| KL220                     | Microglossum olivaceum      | TU 101778             | TypeSpecies                 | Leotiaceae                       | Leotiaceae                  | GenBank MH752066                                          |
| JN033418                  | Microscypha ellisii         | KUS F52489            |                             | Pezizellaceae                    | Pezizellaceae               |                                                           |
| KC834064                  | Miniancora allisoniensis    | CCM F-30487           | exTypeSpecimen              | Ascomycota incertae sedis (2)    | Leotiales incertae sedis    |                                                           |
| AY789282                  | Mitruula borealis           | DAOM 160731           |                             | Mitrulaceae                      | Mitrulaceae                 |                                                           |
| AY789434                  | Mitruula elegans            | DMWV04-78             |                             | Mitrulaceae                      | Mitrulaceae                 |                                                           |
| AY789281                  | Mitruula lunulatospora      | DAOM 160732           |                             | Mitrulaceae                      | Mitrulaceae                 |                                                           |
| AY789424                  | Mitruula paludosa           | MBH 50636             | TypeSpecies                 | Mitrulaceae                      | Mitrulaceae                 |                                                           |
| KX273438                  | Mitruulinia ushuaiae        | PDD 105643            | Type Species                | Helotiales incertae sedis        | Helotiaceae                 |                                                           |
| KX273437                  | Mitruulinia ushuaiae        | PDD 107564            | Type Species                | Helotiales incertae sedis        | Helotiaceae                 |                                                           |
| KU668566                  | Moellerodiscus lentus       | HMAS 275557           |                             | Rutstroemiaceae                  | Rutstroemiaceae             |                                                           |
| AB926078                  | Moellerodiscus pinicola     | TNS-F-40115           |                             | Rutstroemiaceae                  | Rutstroemiaceae             |                                                           |
| M_ame_Hosoya              | 'Mollisia' amenticola       | TNS-F-30411           |                             | Mollisiaceae                     |                             | GenBank LC425041                                          |
| DQ491498                  | Mollisia cinerea            | OSC 100029            | TypeSpecies                 | Mollisiaceae                     | Mollisiaceae                |                                                           |
| HM116746                  | 'Mollisia' dextrinospora    | ICMP 18083            |                             |                                  |                             |                                                           |
| AY259138                  | Mollisia fusca              | CBS 234.71            |                             | Mollisiaceae                     | Mollisiaceae                |                                                           |
| AY259137                  | 'Mollisia fusca'            | CBS 486.48            |                             |                                  |                             |                                                           |
| MG195562                  | 'Mollisia' sp.              | ICMP 21729            |                             |                                  |                             |                                                           |
| JN033404                  | 'Mollisia' uncinata         | KUS F52307            |                             |                                  |                             |                                                           |
| Z73778                    | Monilinia fructicola        | LMK125                | TypeSpecies                 | Sclerotiniaceae                  | Sclerotiniaceae             |                                                           |
| AH009124                  | Mycoarthritis corallinus    | Landvik               | exTypeSpecimen              | Hyaloscyphaceae (2)              | Stamnia lineage/Han Clade 9 |                                                           |
| AB469683                  | Mycochaetophora gentianae   | MAFF 239231           |                             | Ploettnerulaceae                 | Ploettnerulaceae            |                                                           |
| KC834065                  | Mycofalcella calcarata      | CCM F-10289           | exTypeSpecimen              | incertae sedis                   | Helotiaceae                 |                                                           |
| AB254177                  | Mycopappus alni             | CBS 893.85            | TypeSpecies                 | Sclerotiniaceae                  | Sclerotiniaceae             |                                                           |
| NR_137807                 | Mycosymbiocytes mycenophila | OSC 148294            | exTypeSpecimen              | Leotiomycetes incertae sedis (2) | Leotiales incertae sedis    |                                                           |
| JX219379                  | Myriodiscus sparassoides    | KKUK1                 | TypeSpecies                 | Tympanidaceae                    | Tympanidaceae               |                                                           |
| LMK759                    | Myriosclerotinia curreyana  | NCBI Genome           |                             | Sclerotiniaceae                  | Sclerotiniaceae             | ITS extracted from NCBI genome                            |
| LMK746                    | Myriosclerotinia duriaeana  | NCBI Genome           |                             | Sclerotiniaceae                  | Sclerotiniaceae             | ITS extracted from NCBI genome                            |
| LMK735                    | Myriosclerotinia scirpicola | NCBI Genome           | TypeSpecies                 | Sclerotiniaceae                  | Sclerotiniaceae             | ITS extracted from NCBI genome                            |
| NR_119412                 | Myxocephala albida          | CBS 962.87            | exTypeSpecimen              | Sordariomycetes (2)              | Helotiales incertae sedis   |                                                           |
| AF062813                  | Myxotrichum chartarum       | UAMH 1997             | Type Species                | Myxotrichaceae                   | Myxotrichaceae              |                                                           |
| Bills_F267_639            | Naemacyclus fimbriatus      | Gerald Bills F267-639 | TypeSpecies                 | Marthamycetaceae                 | Marthamycetaceae            | ITS available from ITS alignment, MWLR DataStore          |
| AY853224                  | Naevala minutissima         | CBS 115934            | TypeSpecies                 | Calloriaceae                     | Discinella-Pezoloma lineage |                                                           |
| HM116779                  | Neobulgaria alba            | ICMP 18395            |                             | Gelatinodiscaceae                | Gelatinodiscaceae           | MWLR genome also available for this specimen              |
| DQ257366                  | Neobulgaria pura            | CUP 063609            | Type Species                | Gelatinodiscaceae                | Gelatinodiscaceae           |                                                           |
| NR_156388                 | Neocrinula lambertiae       | CBS 143423            |                             | Neocrinulaceae (2)               | Neocrinulaceae              |                                                           |

| Genbank accession or code | Species                           | Voucher       | Type status of specimen (3) | Family (1, 2)               | Accepted family                | Notes                                               |
|---------------------------|-----------------------------------|---------------|-----------------------------|-----------------------------|--------------------------------|-----------------------------------------------------|
| KY173412                  | Neocrinula xanthorrhoeae          | CPC 29474     | exTypeSpecimen              | Neocrinulaceae (2)          | Neocrinulaceae                 |                                                     |
| KY173414                  | Neocrinula xanthorrhoeae          | CPC 29474     | TypeSpecies                 | Neocrinulaceae (2)          | Neocrinulaceae                 |                                                     |
| NR_121301                 | Neocudoniella radicella           | UAMH 5794     |                             | Gelatinodisceae             | Bryoglossum lineage            |                                                     |
| MH578547                  | Neodasyscypha cerina              | ICMP 22829    |                             | Lachnaceae                  | Lachnaceae                     |                                                     |
| U57812                    | Neodasyscypha cerina              | JHH3916 NYS   | Type Species                | Lachnaceae                  | Lachnaceae                     |                                                     |
| NR_144926                 | Neofabraea malicorticis           | CBS 102863    | exTypeSpecimen              | Dermateaceae                | Dermateaceae                   | neotype                                             |
| LC228670                  | Nervostroma depraedans            | JCM 14252     | exTypeSpecimen              | Sclerotiniaceae             | Sclerotiniaceae                |                                                     |
| JF412009                  | Oculimacula yallundae             | CBS 494.80    | TypeSpecies                 | Ploettnerulaceae            | Ploettnerulaceae               |                                                     |
| NR_111035                 | Oidiodendron fuscum               | UAMH 8511     | exTypeSpecimen              | Myxotrichaceae              | Myxotrichaceae                 |                                                     |
| Oidma1                    | Oidiodendron maius                | JGIgenome     |                             | Myxotrichaceae              | Myxotrichaceae                 | ITS extracted from JGI genome                       |
| JN033380                  | Olla millepunctata                | CBS 100302    |                             | Hyaloscyphaceae             | Hyaloscyphaceae                |                                                     |
| HQ533049                  | Orbiliopsis callistea             | PDD 97932     |                             | Helotiales incertae sedis   | Helotiales incertae sedis      |                                                     |
| Z73797                    | Ovulinia azaleae                  | ATCC 1189     | TypeSpecies                 | Sclerotiniaceae             | Sclerotiniaceae                |                                                     |
| KC833168                  | Pachycudonia constrictospora      | C307          | TypeSpecies                 | Cudoniaceae                 | Cudoniaceae                    |                                                     |
| NR_132835                 | Parafabraea eucalypti             | CBS 124810    | exTypeSpecimen              | Dermateaceae                | Dermateaceae                   |                                                     |
| KT876978                  | Patinella hyalophaea              | Baral HB9739  | TypeSpecies                 | Helotiales incertae sedis   | Leotiomyces incertae sedis     |                                                     |
| U57988                    | Perrotia flammea                  | JHH4497 NYS   | Type Species                | Lachnaceae                  | Lachnaceae                     |                                                     |
| NR_144927                 | Pezicula carpinea                 | CBS 923.96    | exTypeSpecimen              | Dermateaceae                | Dermateaceae                   | epitype                                             |
| D1095                     | Pezicula sp.                      | ICMP 22856    |                             | Dermateaceae                | Dermateaceae                   | GenBank MH921872; on Nothofagus                     |
| KJ559546                  | 'Pezizella' epithallina           | TU 39378      |                             |                             |                                | assumed to be misnamed, in Han Clade 9              |
| MH578481                  | Pezizellaceae sp Phormium         | PDD 111530    |                             |                             |                                |                                                     |
| MH578459                  | Pezizellaceae sp.                 | ICMP 22770    |                             |                             |                                |                                                     |
| MH682232                  | Pezizellaceae sp.                 | ICMP 22832    |                             |                             |                                |                                                     |
| MH578465                  | Pezizellaceae sp. Collospermum    | ICMP 22776    |                             |                             |                                |                                                     |
| MH578469                  | Pezizellaceae sp. Knightia        | ICMP 22780    |                             |                             |                                |                                                     |
| MH578474                  | Pezizellaceae sp. Nothofagus leaf | ICMP 22785    |                             |                             |                                |                                                     |
| MH578482                  | Pezizellaceae sp. on Cortaderia   | PDD 111531    |                             |                             |                                |                                                     |
| KC412000                  | Pezoloma ciliifera                | F265954       |                             | Discinella-Pezoloma lineage | Discinella-Pezoloma lineage    |                                                     |
| KJ663841                  | Phacidium lacerum                 | AFTOL-ID 1253 |                             | Phaciaceae                  | Phaciaceae                     |                                                     |
| NR_145381                 | Phacidium lauri                   | CBS 308.68    | exTypeSpecimen              | Phaciaceae                  | Phaciaceae                     | epitype                                             |
| D2457                     | Phaeohelotium confusum            | PDD 112244    |                             | Helotiaceae                 | Helotiaceae                    | GenBank MH921873                                    |
| KT876976                  | Phaeohelotium epiphyllum          | Baral HB9911  |                             | Helotiaceae                 | Helotiaceae                    |                                                     |
| AB926061                  | Phaeohelotium epiphyllum          | TNS-F-40042   |                             | Helotiaceae                 | Helotiaceae                    |                                                     |
| KC411992                  | Phaeohelotium geogenum            | Baral HB7222A |                             | Helotiaceae                 | Helotiaceae                    |                                                     |
| KC411991                  | Phaeohelotium monticola           | Baral HB8612  | TypeSpecies                 | Helotiaceae                 | Helotiaceae                    |                                                     |
| KC411988                  | Phaeohelotium undulatum           | AH7337        |                             | Helotiaceae                 | Helotiaceae                    |                                                     |
| JN033424                  | Phialina lachnabrachyoides        | KUS F52576    |                             | Pezizellaceae               | Pezizellaceae                  |                                                     |
| MG195534                  | Phialocephala bamuru              | PDD 56863     |                             | Mollisiaceae                | Mollisiaceae                   |                                                     |
| NR_135931                 | Phialocephala dimorphospora       | CBS 300.62    | exTypeSpecimen              | Mollisiaceae                | Mollisiaceae                   |                                                     |
| MG195479                  | Phialocephala oblonga             | PDD 58596     |                             | Mollisiaceae                | Mollisiaceae                   |                                                     |
| NR_111319                 | Phialocephala piceae              | UAMH 10851    | exTypeSpecimen              | Mollisiaceae                | Mollisiaceae                   |                                                     |
| Phisc1                    | Phialocephala scopiformis         | JGIgenome     |                             | Mollisiaceae                | Mollisiaceae                   | ITS extracted from JGI genome                       |
| MG195462                  | Phialocephala sp.                 | ICMP 21725    |                             | Mollisiaceae                | Mollisiaceae                   |                                                     |
| PRJEB12348                | Phialocephala subalpina           | UAMH11012     |                             | Mollisiaceae                | Mollisiaceae                   | ITS extracted from NCBI genome                      |
| KR859275                  | Phlyctema vagabunda               | CBS 109875    | TypeSpecies                 | Dermateaceae                | Dermateaceae                   |                                                     |
| LT158483                  | Piceomphale bulgarioides          | TAAM 165289   | TypeSpecies                 | Sclerotiniaceae             | Sclerotiniaceae                |                                                     |
| NR_119500                 | Pilidium acerinum                 | BPI 843555    | exTypeSpecimen              | Chaetomellaceae             | Chaetomellaceae                | epitype                                             |
| KM677205                  | 'Pirotaea' palmicola              | ICMP 13383    |                             |                             |                                | MWLR genome also available for this isolate         |
| KJ755519                  | Pleuroascus nicholsonii           | CBS 345.73    | TypeSpecies                 | Pseudeurotiaceae            | Helotiaceae                    |                                                     |
| AB904505                  | Poculum pseudosydowianum          | TNS-F-40071   |                             | Rutstroemiaceae             | Rutstroemiaceae                |                                                     |
| AY775056                  | Polydesmia pruinosa               | CBS 160.92    | TypeSpecies                 | Helotiales incertae sedis   | Helotiales sclerotinioid clade | as Brefeldochium pruinosa (anamorph of P. pruinosa) |
| JN033453                  | Polydesmia pruinosa               | TNS-F-12764   | TypeSpecies                 | Helotiales incertae sedis   | Helotiales sclerotinioid clade |                                                     |
| MG719690                  | Polyphilus sieberi                | TT3B          | TypeSpecies                 | Hyaloscyphaceae             | Stammaria lineage/Han Clade 9  |                                                     |
| MH327809                  | Porodiplodia livistonae           | CBS 144428    | exTypeSpecimen              | Porodiplodiaceae (2)        | Pezizellaceae                  |                                                     |
| DQ491510                  | Potrebniomyces pyri               | AFTOL-ID 744  | TypeSpecies                 | Phaciaceae                  | Phaciaceae                     |                                                     |
| U57990                    | Proliferodiscus albiviridis       | Cantrell GA34 | TypeSpecies                 | Lachnaceae                  | Lachnaceae                     |                                                     |
| MH682231                  | Proliferodiscus dingleyae         | ICMP 21730    |                             | Lachnaceae                  | Lachnaceae                     |                                                     |

| Genbank accession or code | Species                       | Voucher              | Type status of specimen (3) | Family (1, 2)                     | Accepted family               | Notes                                                                                       |
|---------------------------|-------------------------------|----------------------|-----------------------------|-----------------------------------|-------------------------------|---------------------------------------------------------------------------------------------|
| MH682229                  | Propolis farinosus            | ICMP 17354           |                             | Marthamycetaceae                  | Marthamycetaceae              |                                                                                             |
| JQ256425                  | Propolis versicolor           | ILLS 60497           |                             | Marthamycetaceae                  | Marthamycetaceae              |                                                                                             |
| EF029224                  | Pseudaegerita corticalis      | ICMP 15324           | TypeSpecies                 | Hyaloscyphaceae                   | Hyaloscyphaceae               |                                                                                             |
| EF029235                  | 'Pseudaegerita' viridis       | ICMP 15542           |                             |                                   |                               |                                                                                             |
| NR_111127                 | Pseudeurotium zonatum         | CBS 329.36           | exTypeSpecimen              | Pseudeurotiaceae                  | Pseudeurotiaceae              | AFTOL-ID 1912                                                                               |
| KR859280                  | Pseudofabraea citricarpa      | CBS 130532           | exTypeSpecimen              | Dermateaceae                      | Dermateaceae                  |                                                                                             |
| Pseel                     | Pseudoglyphis elatina         | CBS 651.97           | TypeSpecies                 | Tribliidiaceae                    | Rhytismataceae                | ITS extracted from JGI genome                                                               |
| Pseudest                  | Pseudogymnoascus destructans  | JGIgenome            |                             | Pseudeurotiaceae                  | Pseudeurotiaceae              | ITS extracted from JGI genome                                                               |
| KJ755524                  | Pseudogymnoascus roseus       | UAMH 1990            | TypeSpecies                 | Pseudeurotiaceae                  | Pseudeurotiaceae              |                                                                                             |
| MG385670                  | Pseudopezicula tetraspora     | ATCC 6229            | TypeSpecies                 | cf Drepanopezizaceae              | Discinella-Pezoloma lineage   |                                                                                             |
| D2527                     | 'Pseudopeziza' colensoi       | PDD 112240           |                             |                                   |                               | GenBank MH921874                                                                            |
| EU729125                  | Pseudopeziza medicaginis      | Ap1                  |                             | Drepanopezizaceae                 | Drepanopezizaceae             |                                                                                             |
| KJ663860                  | Pseudophacidium ledi          | CBS 377.59           | TypeSpecies                 | Phacidiaceae                      | Phacidiaceae                  |                                                                                             |
| JN033396                  | Psilachnum staphyleae         | KUS F52105           |                             | Pezizellaceae                     | Stamnaria lineage/Han Clade 9 |                                                                                             |
| JX001640                  | Psychrophila antarctica       | MMW-2013a isolate 92 | exTypeSpecimen              | Helotiales (2)                    | Helotiales incertae sedis     | sister to Arachnopezizaceae in ITS tree, but support needs confirming with additional genes |
| KF859927                  | Pycnopeziza sympodialis       | CBS 332.39           | TypeSpecies                 | Sclerotiniaceae                   | Sclerotiniaceae               |                                                                                             |
| MF143627                  | Pyrenopeziza brassicae        | Cyc029a              |                             | Ploettnerulaceae                  | Ploettnerulaceae              |                                                                                             |
| MF187547                  | Pyrenopeziza brassicae        | PC18                 |                             | Ploettnerulaceae                  | Ploettnerulaceae              |                                                                                             |
| P_pro_Hosoya              | 'Pyrenopeziza' protrusa       | TNS-F-23154          |                             |                                   |                               | GenBank LC426322                                                                            |
| AJ430224                  | 'Pyrenopeziza' revincta       | ARON3150.P           |                             |                                   |                               |                                                                                             |
| JN033413                  | 'Pyrenopeziza' sp.            | KUS F52417           |                             |                                   |                               |                                                                                             |
| MF593628                  | 'Pyrenopeziza' velebitica     | CNF 2 10097          |                             |                                   |                               |                                                                                             |
| AF462422                  | Rhabdocline pseudotsugae      | RPPWA29              | Type Species                | Cenangiaceae                      | Cenangiaceae                  |                                                                                             |
| NR_111086                 | Rhexocercosporidium carotae   | CBS 418.65           | exTypeSpecimen              | Ploettnerulaceae                  | Ploettnerulaceae              |                                                                                             |
| Rhesp1                    | Rhexocercosporidium sp.       | MPI-PUGE-AT-0058     |                             | Ploettnerulaceae                  | Ploettnerulaceae              | ITS extracted from JGI genome                                                               |
| NR_145279                 | Rhizocladosporium argillaceum | CBS 241.67           | exTypeSpecimen              | Helotiales incertae sedis (2)     | Helotiales incertae sedis     |                                                                                             |
| NR_137757                 | Rhizodermea veluwensis        | CBS 110605           | exTypeSpecimen              | Dermateaceae                      | Dermateaceae                  |                                                                                             |
| NR_111110                 | Rhizoscyphus ericae           | UAMH 6735            | exTypeSpecimen              | Hyaloscyphaceae                   | Hyaloscyphaceae               |                                                                                             |
| JN033414                  | 'Rodwayella' citrinula        | KUS F52443           |                             | Pezizellaceae                     |                               |                                                                                             |
| KT876974                  | Rodwayella sessilis           | Baral HB9913         | TypeSpecies                 | Pezizellaceae                     | Pezizellaceae                 |                                                                                             |
| EF060298                  | Roesleria subterranea         | CBS 407.51           | TypeSpecies                 | Roesleriaceae                     | Helotiales                    |                                                                                             |
| R_sub_Hosoya              | Roesleria subterranea         | TNS-F-38701          | TypeSpecies                 | Roesleriaceae                     | Helotiales                    | GenBank AB628057                                                                            |
| KT958773                  | Rommelaarsia flavovirens      | Baral HB9951b        | exTypeSpecimen              | Helotiales incertae sedis (2)     | Stamnaria lineage/Han Clade 9 |                                                                                             |
| KT972711                  | 'Roseodiscus' formosus        | FH (SBRH 686)        |                             |                                   |                               |                                                                                             |
| DH257                     | Roseodiscus rhodoleucus       | HB 8488a             | TypeSpecies                 | incertae sedis                    | Stamnaria lineage/Han Clade 9 | GenBank KT972704                                                                            |
| AB926053                  | Rutstroemia bulgarioides      | TNS-F-40005          |                             | Rutstroemiaceae                   | Rutstroemiaceae               |                                                                                             |
| KF545321                  | Rutstroemia echinophila       | CBS 111548           |                             | Rutstroemiaceae                   | Rutstroemiaceae               |                                                                                             |
| KF545334                  | Rutstroemia firma             | AFTOL-ID 923         | TypeSpecies                 | Rutstroemiaceae                   | Rutstroemiaceae               |                                                                                             |
| KF545331                  | Rutstroemia sydowiana         | CBS 115975           |                             | Rutstroemiaceae                   | Rutstroemiaceae               |                                                                                             |
| LT158423                  | Rutstroemia tiliacea          | TAAM 132844          |                             | Rutstroemiaceae                   | Rutstroemiaceae               |                                                                                             |
| NR_137991                 | Sabahiopsis eucalypti         | CPC 24957            | exTypeSpecimen              | Helotiales incertae sedis (2)     | Cordieritidaceae              |                                                                                             |
| AY590786                  | Sarea difformis               | olrim59              | Type Species                |                                   |                               |                                                                                             |
| DQ195784                  | Satchmopsis brasiliensis      | CBS 420.93           | TypeSpecies                 | Pezizomycotina incertae sedis (2) | Leotiales incertae sedis      |                                                                                             |
| DQ195786                  | Satchmopsis brasiliensis      | CPC 11017            | TypeSpecies                 | Pezizomycotina incertae sedis (2) | Leotiales incertae sedis      |                                                                                             |
| LT158464                  | 'Sclerencoelia' fascicularis  | TU 104508            |                             |                                   |                               |                                                                                             |
| AY789408                  | Scleromitrla shiriana         | Hirayama062001       | TypeSpecies                 | Sclerotiniaceae                   | Rutstroemiaceae               |                                                                                             |
| Z81448                    | Scleromitrla spiraeicola      | strain 1336.1        | Type Species                | Sclerotiniaceae                   | Rutstroemiaceae               |                                                                                             |
| AF141169                  | Scleropezicula alnicola       | CBS 474.97           | TypeSpecies                 | Pezizellaceae                     | Pezizellaceae                 |                                                                                             |
| Scisc                     | Sclerotinia sclerotiorum      | ATCC 18683           | TypeSpecies                 | Sclerotiniaceae                   | Sclerotiniaceae               | ITS extracted from JGI genome                                                               |
| KF859932                  | Sclerotinia sclerotiorum      | DAOM 241671          | Type Species                | Sclerotiniaceae                   | Sclerotiniaceae               |                                                                                             |
| IHIA52                    | Scytalidium lignicola         | DSM 105466           |                             | Leotiomycetes incertae sedis (2)  | Helotiales incertae sedis     | ITS extracted from NCBI genome                                                              |
| NR_121314                 | Scytalidium lignicola         | UAMH 1502            | exTypeSpecimen              | Leotiomycetes incertae sedis (2)  | Helotiales incertae sedis     |                                                                                             |
| U57991                    | Solenopezia solenia           | JHH4169 NYS          | Type Species                | Lachnaceae                        | Lachnaceae                    |                                                                                             |
| JX124327                  | Soosiella minima              | MH-2012 strain 1230  | exTypeSpecimen              | Helotiales incertae sedis (2)     | Helotiales - Han Clade 4      |                                                                                             |
| Spaf11                    | Spathularia flavida           | Spaf11               | TypeSpecies                 | Cudoniaceae                       | Cudoniaceae                   | ITS extracted from JGI genome                                                               |
| AF433155                  | Spathularia flavida           | wz95                 | Type Species                | Cudoniaceae                       | Cudoniaceae                   |                                                                                             |

| Genbank accession or code | Species                    | Voucher                 | Type status of specimen (3) | Family (1, 2)                 | Accepted family               | Notes                         |
|---------------------------|----------------------------|-------------------------|-----------------------------|-------------------------------|-------------------------------|-------------------------------|
| NR_119916                 | Sphaerographium nyssicola  | CBS 128284              |                             | Chaetomellaceae               | Chaetomellaceae               |                               |
| HQ696658                  | Spirosphaera floriformis   | CBS 402.52              | exTypeSpecimen              | Helotiales incertae sedis (2) | Helotiaceae                   |                               |
| KT972707                  | Stamnaria americana        | D. Haelew. 258a         |                             | Stamnaria lineage             | Stamnaria lineage/Han Clade 9 |                               |
| MG662189                  | Stamnaria americana        | D. Haelew. 941d         |                             | Stamnaria lineage             | Stamnaria lineage/Han Clade 9 |                               |
| KT972708                  | Stamnaria austriaca        | 940a                    |                             | Stamnaria lineage             | Stamnaria lineage/Han Clade 9 |                               |
| MG662201                  | Stamnaria persoonii        | D. Haelew. 671a         |                             | Stamnaria lineage             | Stamnaria lineage/Han Clade 9 |                               |
| MG662203                  | Stamnaria yugrana          | D. Haelew. 603a         |                             | Stamnaria lineage             | Stamnaria lineage/Han Clade 9 |                               |
| AY818330                  | Streptobotrys streptothrix | DAOM 37579              | Type Species                | Sclerotiniaceae               |                               | as Streptobotrys streptothrix |
| Z73801                    | Stromatinia rapulum        | strain 1243.1           | Type Species                | Sclerotiniaceae               | Sclerotiniaceae               |                               |
| S_bak_Hosoya              | Strossmayeria bakeriana    | TNS-F-11199             |                             | Strossmayeria lineage         | Strossmayeria lineage         | GenBank LC425043              |
| KT876977                  | Strossmayeria basitricha   | Baral HB9904b           |                             | Strossmayeria lineage         | Strossmayeria lineage         |                               |
| KY462386                  | Strossmayeria sp.          | DHP-CH-108              |                             | Strossmayeria lineage         | Strossmayeria lineage         |                               |
| JX989830                  | Synchaetomella acerina     | DAOM 242271             |                             | Chaetomellaceae               | Chaetomellaceae               |                               |
| T_fusc_Hosoya             | Tapesia fusca              | TNS-F-17463             | TypeSpecies                 | Mollisiaceae                  | Mollisiaceae                  | GenBank LC425049              |
| AY129291                  | Teberdinia hygrophila      | CBS 102670              | exTypeSpecimen              | Pseudeurotiaceae              | Pseudeurotiaceae              |                               |
| AY100665                  | Terriera minus             | ICMP 13974              |                             | Rhytismataceae                | Rhytismataceae                |                               |
| KC834066                  | Tetrachaetum elegans       | CBM11                   | TypeSpecies                 | Ascomycota incertae sedis (2) | Discinella-Pezoloma lineage   |                               |
| JX029109                  | Tetracladium globosum      | isolate 215             |                             | Helotiales incertae sedis     | Stamnaria lineage/Han Clade 9 |                               |
| CCM_F26199                | Tetracladium marchalianum  | CCM F-26199             | TypeSpecies                 | Helotiales incertae sedis     | Stamnaria lineage/Han Clade 9 |                               |
| EU883424                  | Tetracladium palmatum      | CCM F-10001             |                             | Helotiales incertae sedis     | Stamnaria lineage/Han Clade 9 |                               |
| KJ559535                  | Thamnogalla crombiei       | Diederich 17553         | Type Species                | Cordieritidaceae              | Cordieritidaceae              |                               |
| GU269839                  | Thedongia ligustrina       | CBS 132025              | TypeSpecies                 | Drepanopezizaceae             | Drepanopezizaceae             |                               |
| FJ839630                  | Thedongia ligustrina       | CPC 14754               | Type Species                | Drepanopezizaceae             | Drepanopezizaceae             |                               |
| Thest1                    | Thelebolus stercoreus      | Thest1                  | Type Species                | Thelebolaceae                 | Thelebolaceae                 | ITS extracted from JGI genome |
| JQ256427                  | Thuemenidium atropurpureum | ILLS 61044              |                             | Leotiaceae                    | Leotiaceae                    |                               |
| NR_132907                 | Tiarosporella paludosa     | CPC 22701               | exTypeSpecimen              | Phaciidiaceae                 | Leotiomyces incertae sedis    | epitype                       |
| KC412008                  | Torrendiella ciliata       | F132996                 | TypeSpecies                 | Rutstroemiaceae               | Rutstroemiaceae               |                               |
| JN033398                  | Trichopeziza sulphurea     | KUS F52218              | TypeSpecies                 | Lachnaceae                    | Lachnaceae                    |                               |
| U57813                    | Trichopezizella nidulus    | JHH4485 NYS             | Type Species                | Lachnaceae                    | Lachnaceae                    |                               |
| T_ota_Hosoya              | Trichopezizella otanii     | FC-2156, TNS-F-16579    |                             | Lachnaceae                    | Lachnaceae                    | GenBank AB481287              |
| JQ417289                  | 'Tricladium' kelleri       | CBS 130985              |                             |                               |                               |                               |
| KC834068                  | Tricladium obesum          | CCM F-14598             |                             | Helotiaceae (2)               | Helotiaceae                   |                               |
| AY204635                  | Tricladium splendens       | CCM F-16599             | TypeSpecies                 | Helotiaceae (2)               | Helotiaceae                   |                               |
| EU019300                  | Trimmatostroma salicis     | CPC 13571               | TypeSpecies                 | Mollisiaceae                  | Mollisiaceae                  |                               |
| LT158459                  | Trochila ilicina           | BPI 877264              |                             | Cenangiaceae                  | Cenangiaceae                  |                               |
| LT158460                  | Trochila laurocerasi       | BPI 879818              |                             | Cenangiaceae                  | Cenangiaceae                  |                               |
| KY657581                  | Tromeropsis microtheca     | Baral HB10054           | TypeSpecies                 | Leotiomyces incertae sedis    | Leotiomyces incertae sedis    |                               |
| FN868463                  | Tryblidiopsis pinastris    | BLE11                   | TypeSpecies                 | Rhytismataceae                | Rhytismataceae                |                               |
| JF793678                  | Tryblidiopsis pinastris    | CBS 445.71              | TypeSpecies                 | Rhytismataceae                | Rhytismataceae                |                               |
| LQH8c                     | Tympanis confusa           | Farlow (LQH8c)          |                             | Tympanidaceae                 | Tympanidaceae                 | GenBank MH810146              |
| AA1a                      | Tympanis tsugae            | Farlow (AA1a)           |                             | Tympanidaceae                 | Tympanidaceae                 | GenBank MH810147              |
| HG326612                  | Unguicularia unguiculata   | NK322                   | TypeSpecies                 | Hyaloscyphaceae               | Helotiales incertae sedis     |                               |
| JN033443                  | Urceolella carestiana      | TNS-F-18014             |                             | Hyaloscyphaceae               | Stamnaria lineage/Han Clade 9 |                               |
| JN033379                  | Urceolella crispula        | KACC 45486              | Type Species                | Hyaloscyphaceae               | Stamnaria lineage/Han Clade 9 |                               |
| KF212190                  | Valdensinia heterodoxa     | Val5                    | Type Species                | Sclerotiniaceae               | Sclerotiniaceae               |                               |
| LT904725                  | Vandijkella johannae       | CBS 143182              | exTypeSpecimen              | Vandijkellaceae (2)           | Vandijkellaceae               |                               |
| CCM_F19494                | 'Varicosporium' delicatum  | CCM F-19494, CBS 574.95 |                             |                               |                               | GenBank JQ412864              |
| DQ202517                  | Varicosporium elodeae      | CBS 541.92              | TypeSpecies                 | Helotiaceae (2)               | Discinella-Pezoloma lineage   |                               |
| CCM_F04276                | Varicosporium elodeae      | CCM F-04276             | TypeSpecies                 | Helotiaceae (2)               | Discinella-Pezoloma lineage   | GenBank MK226459              |
| NR_111206                 | Variocladium giganteum     | CBS 508.71              |                             | Helotiaceae (2)               | Mollisiaceae                  |                               |
| LT158421                  | Velutarina alpestris       | Baral HB8252a           |                             | Cenangiaceae                  | Cenangiaceae                  |                               |
| JN033447                  | Venturiocistella japonica  | TNS-F-18030             |                             | Hyaloscyphaceae               | Helotiales - Han Clade 4      |                               |
| VCU21826                  | Verpatinia calthicola      | LMK448                  | TypeSpecies                 | Sclerotiniaceae               | Sclerotiniaceae               |                               |
| EU434854                  | Vibrissea truncorum        | AFTOL-ID 1322           | TypeSpecies                 | Vibrisseaceae                 | Vibrisseaceae                 |                               |
| EU434855                  | Vibrissea truncorum        | CBS 143.92              | TypeSpecies                 | Vibrisseaceae                 | Vibrisseaceae                 |                               |
| KF429257                  | Vibrissea wood in stream   | ICMP 19442              |                             | Vibrisseaceae                 | Vibrisseaceae                 |                               |
| HQ599580                  | Xenopolyscytalum pinea     | CPC 14225               | exTypeSpecimen              | Helotiales incertae sedis (2) | Peziellaceae                  |                               |

| Genbank accession or code | Species                     | Voucher    | Type status of specimen (3) | Family (1, 2)                 | Accepted family           | Notes |
|---------------------------|-----------------------------|------------|-----------------------------|-------------------------------|---------------------------|-------|
| JX454953                  | Xerombrophila crystallifera | CBS 128289 | exTypeSpecimen              | Gelatinodiscaceae             | Gelatinodiscaceae         |       |
| LT158441                  | Xeropilidium dennisii       | TU 104501  | exTypeSpecimen              | Chaetomellaceae               | Chaetomellaceae           |       |
| GQ272624                  | Xylogone sphaerospora       | ATCC 34392 | exTypeSpecimen              | Helotiales incertae sedis (2) | Helotiales incertae sedis |       |
