# Supplementary material for: A multigene phylogeny toward a new phylogenetic classification of Leotiomycetes
Source: PubMed Central journal article supplement (PMC7325659; doi:10.1186/s43008-019-0002-x), 2019-06-07

Calibration selected from:  
 P: Pezizomycotina > 400 ma  
 F: Fruit fly vs mosquito 235-417 ma  
 E: Eudicot vs monocot 144-206 ma

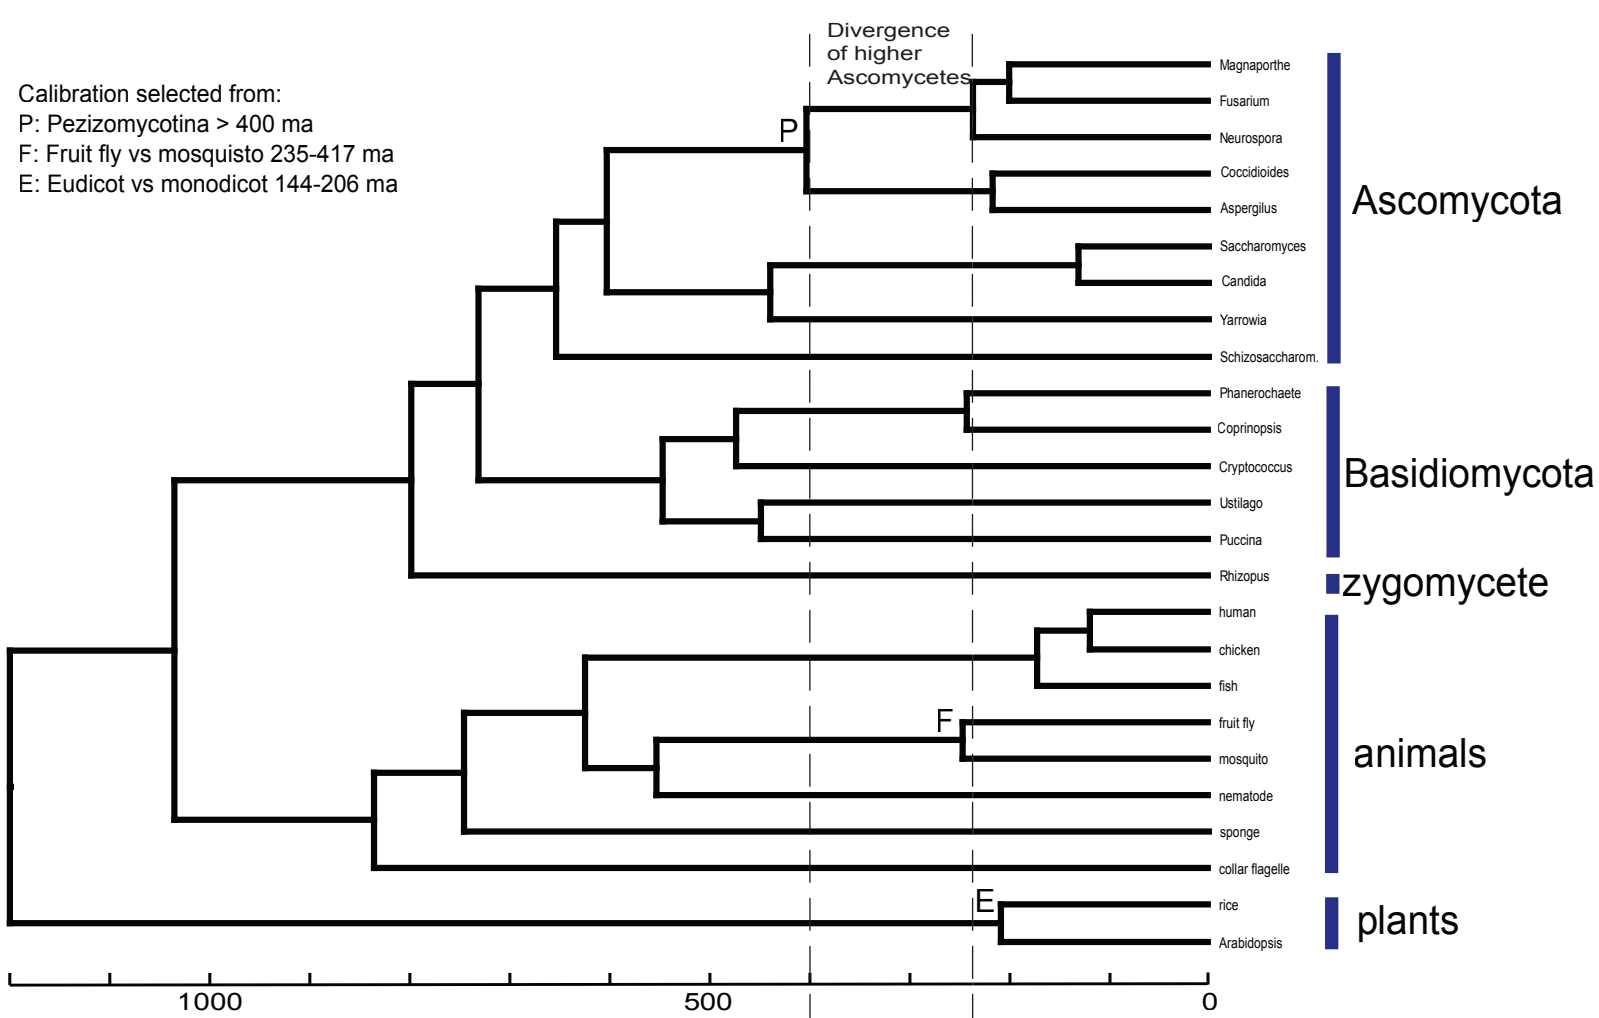

\*AFTOL genes

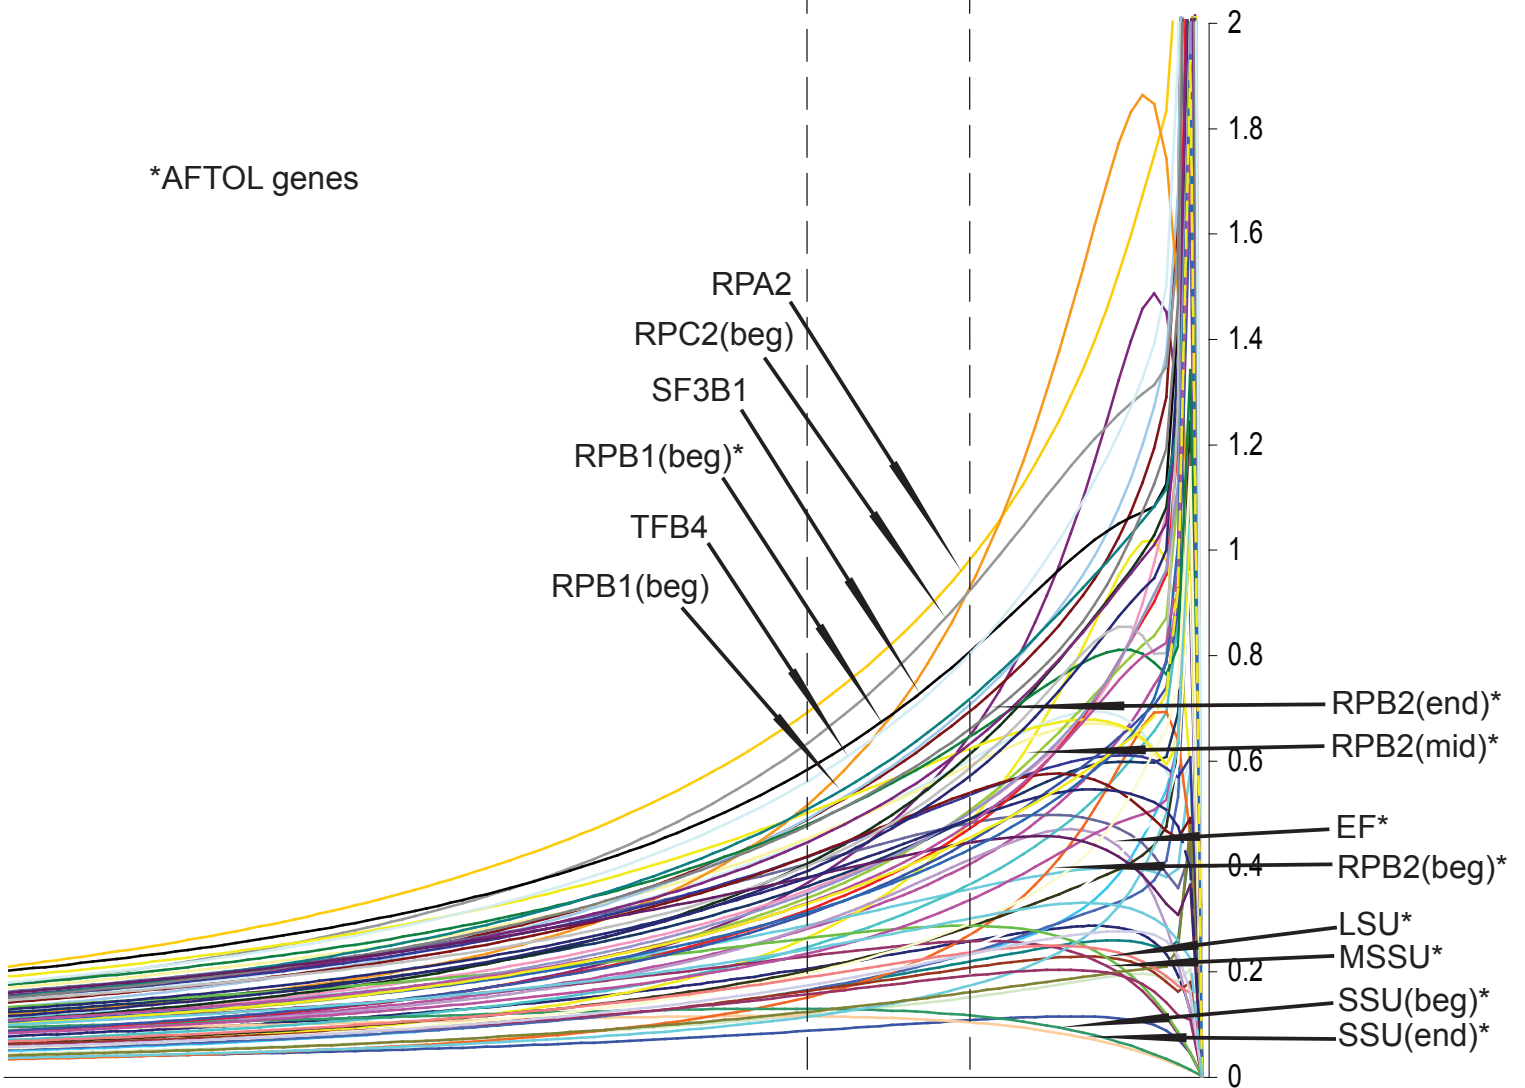

Supplement: 43008_2019_2_MOESM3_ESM.pdf [file 43008_2019_2_MOESM3_ESM.pdf]
