# Supplementary material for: A multigene phylogeny toward a new phylogenetic classification of Leotiomycetes
Source: PubMed Central journal article supplement (PMC7325659; doi:10.1186/s43008-019-0002-x), 2019-06-07
Supplement: 43008_2019_2_MOESM7_ESM.pdf [file 43008_2019_2_MOESM7_ESM.pdf]

**Suppl Data Table S6.** Summary of the family level relationships of the genera treated, comparing the taxonomy of Baral (2016) with the relationships suggested in our analyses (genera where higher taxon has changed are in bold). Where a genus was not treated by Baral (2016) the family level classification provided by Index Fungorum is provided. Also provided is the type status of the specimens used in our analyses, and where the suggested relationship is based on the ITS analysis only.

(1) based on Baral (2016) unless otherwise stated

(2) based on Index Fungorum, accessed 3 September 2018, <http://www.indexfungorum.org/names/names.asp>

(3) based on the ITS gene tree only

(4) type material with ITS data only

| genus                   | current family (1, 2)                    | accepted family (3)                                    | type status of specimens sequenced (4) | note                                                                                                                                                                              |
|-------------------------|------------------------------------------|--------------------------------------------------------|----------------------------------------|-----------------------------------------------------------------------------------------------------------------------------------------------------------------------------------|
| Acephala                | Mollisiaceae                             | Mollisiaceae                                           | exTypeSpecimen                         |                                                                                                                                                                                   |
| Acidea                  | Discinella-Pezoloma lineage              | Discinella-Pezoloma lineage (3)                        | exTypeSpecimen                         |                                                                                                                                                                                   |
| Acidomelania            | Mollisiaceae                             | Mollisiaceae (3)                                       | exTypeSpecimen                         |                                                                                                                                                                                   |
| <b>Alatospora</b>       | <b>Leotiaceae (2)</b>                    | <b>Leotiales incertae sedis</b>                        | <b>TypeSpecies</b>                     |                                                                                                                                                                                   |
| Albotricha              | Lachnaceae                               | Lachnaceae                                             | TypeSpecies                            |                                                                                                                                                                                   |
| Allantophomopsiella     | Phacidiaceae                             | Phacidiaceae (3)                                       | exTypeSpecimen                         |                                                                                                                                                                                   |
| Allantophomopsis        | Phacidiaceae                             | Phacidiaceae (3)                                       | exTypeSpecimen                         |                                                                                                                                                                                   |
| Ameghiniella            | Cordieritidaceae                         | Cordieritidaceae                                       | TypeSpecies                            |                                                                                                                                                                                   |
| Amicodisca              | Hyaloscyphaceae                          | Hyaloscyphaceae (3)                                    | TypeSpecies (4)                        | A. castaneae in the 15 gene tree is distant to the type species A. virella in the ITS tree.                                                                                       |
| Amorphotheca            | Amorphothecaceae                         | Amorphothecaceae                                       | exTypeSpecimen (4)                     |                                                                                                                                                                                   |
| Amylocarpus             | Helotiaceae                              | Helotiaceae (3)                                        | TypeSpecies                            | closely related to 'Hymenoscyphus' repandus CBS 341.76 in ITS tree                                                                                                                |
| Antarctomyces           | Thelebolaceae                            | Thelebolaceae (3)                                      | exTypeSpecimen                         |                                                                                                                                                                                   |
| <b>Aotearomyces</b>     | <b>Tympanidaceae</b>                     | <b>Leotiales incertae sedis</b>                        | <b>TypeSpecies</b>                     |                                                                                                                                                                                   |
| Aotearomyces            | Tympanidaceae                            | Leotiales incertae sedis                               | TypeSpecies                            |                                                                                                                                                                                   |
| Aquapoterium            | Helotiales incertae sedis (2)            | Helotiales incertae sedis (3)                          | exTypeSpecimen                         |                                                                                                                                                                                   |
| Arachnopeziza           | Arachnopezizaceae                        | Arachnopezizaceae                                      | TypeSpecies                            |                                                                                                                                                                                   |
| <b>Arbusculina</b>      | <b>Pezizomycotina incertae sedis (2)</b> | <b>Hyaloscyphaceae (3)</b>                             |                                        |                                                                                                                                                                                   |
| Articulospora           | Discinella-Pezoloma lineage              | Discinella-Pezoloma lineage                            | TypeSpecies                            |                                                                                                                                                                                   |
| Ascocalyx               | Godroniaceae                             | Godroniaceae (3)                                       |                                        |                                                                                                                                                                                   |
| Ascocoryne              | Gelatinodiscaceae                        | Gelatinodiscaceae                                      | TypeSpecies                            |                                                                                                                                                                                   |
| Ascotremella            | Gelatinodiscaceae                        | Gelatinodiscaceae (3)                                  | TypeSpecies                            |                                                                                                                                                                                   |
| <b>Asperopilum</b>      | <b>Hyaloscyphaceae</b>                   | <b>Lachnaceae (3)</b>                                  | <b>TypeSpecies</b>                     |                                                                                                                                                                                   |
| Asterocalyx             | Helotiales incertae sedis                | Helotiales incertae sedis (3)                          | TypeSpecies                            |                                                                                                                                                                                   |
| <b>Austropezia</b>      | <b>Arachnopezizaceae</b>                 | <b>Pezizellaceae (3)</b>                               | <b>TypeSpecies</b>                     |                                                                                                                                                                                   |
| Banksiamyces            | incertae sedis                           | Helotiales incertae sedis (3)                          |                                        |                                                                                                                                                                                   |
| <b>Barrenia</b>         | <b>Helotiales incertae sedis (2)</b>     | <b>Mollisiaceae (3)</b>                                | <b>exTypeSpecimen</b>                  |                                                                                                                                                                                   |
| Belonioscyphella        | Helotiales incertae sedis                | Helotiales (Stammaria lineage/Han Clade 9) (3)         | TypeSpecies                            |                                                                                                                                                                                   |
| Bicornispora            | Rutstroemiaceae                          | Rutstroemiaceae (3)                                    | TypeSpecies                            |                                                                                                                                                                                   |
| Bisporella              | Helotiaceae                              | Helotiaceae (3)                                        |                                        | based on Bispora, anamorph of Bisporella                                                                                                                                          |
| Bivallum                | Rhytismataceae                           | Rhytismataceae (3)                                     |                                        |                                                                                                                                                                                   |
| Bloxamia                | Pezizellaceae                            | Pezizellaceae (3)                                      | TypeSpecies                            |                                                                                                                                                                                   |
| Blumeria                | Erysiphaceae                             | Erysiphaceae                                           | TypeSpecies                            |                                                                                                                                                                                   |
| Blumeriella             | Drepanopezizaceae                        | Drepanopezizaceae (3)                                  |                                        |                                                                                                                                                                                   |
| Botrytis                | Sclerotiniaceae                          | Sclerotiniaceae                                        | TypeSpecies                            |                                                                                                                                                                                   |
| <b>Brunaudia</b>        | <b>Patellariaceae (2)</b>                | <b>Helotiaceae (3)</b>                                 | <b>TypeSpecies</b>                     |                                                                                                                                                                                   |
| Brunnipila              | Lachnaceae                               | Lachnaceae                                             |                                        |                                                                                                                                                                                   |
| Bryoglaviculus          | Bryoglossum lineage                      | Bryoglossum lineage (3)                                | exTypeSpecimen                         |                                                                                                                                                                                   |
| Bryoglossum             | Bryoglossum lineage                      | Bryoglossum lineage (3)                                | TypeSpecies                            |                                                                                                                                                                                   |
| Bryoscyphus             | Helotiaceae                              | Helotiaceae                                            |                                        |                                                                                                                                                                                   |
| Bulgaria                | Phacidiaceae                             | Phacidiaceae                                           | TypeSpecies                            |                                                                                                                                                                                   |
| <b>Bulgariella</b>      | <b>Helotiales incertae sedis</b>         | <b>Helotiaceae</b>                                     | <b>TypeSpecies</b>                     |                                                                                                                                                                                   |
| Byssosascus             | Myxotrichaceae                           | Myxotrichaceae (3)                                     | exTypeSpecimen                         |                                                                                                                                                                                   |
| Cadophora               | Ploettnerulaceae                         | Ploettnerulaceae                                       | TypeSpecies (4)                        |                                                                                                                                                                                   |
| Cairneyella             | Helotiales incertae sedis (2)            | Helotiales incertae sedis (hyaloscyphoid clade)        | exTypeSpecimen                         |                                                                                                                                                                                   |
| Calloria                | Calloriaceae                             | Helotiales (Stammaria lineage/Han Clade 9) (3)         |                                        |                                                                                                                                                                                   |
| Calycellina             | Pezizellaceae                            | Pezizellaceae (3)                                      |                                        |                                                                                                                                                                                   |
| <b>Calycellinopsis</b>  | <b>Dermateaceae (2)</b>                  | <b>Cenangiaceae</b>                                    | <b>TypeSpecies</b>                     |                                                                                                                                                                                   |
| Calycina                | Pezizellaceae                            | Pezizellaceae                                          |                                        |                                                                                                                                                                                   |
| Capitotricha            | Lachnaceae                               | Lachnaceae (3)                                         | TypeSpecies                            |                                                                                                                                                                                   |
| <b>Cashiella</b>        | <b>Helotiales incertae sedis</b>         | <b>Helotiales incertae sedis (3)</b>                   |                                        |                                                                                                                                                                                   |
| Catenulifera            | Helotiales incertae sedis (2)            | Helotiales (Han Clade 4) (3)                           |                                        |                                                                                                                                                                                   |
| Cenangioopsis           | Cenangiaceae                             | Cenangiaceae                                           | TypeSpecies                            |                                                                                                                                                                                   |
| Cenangium               | Cenangiaceae                             | Cenangiaceae                                           | TypeSpecies                            |                                                                                                                                                                                   |
| Chaetomella             | Chaetomellaceae                          | Chaetomellaceae                                        | TypeSpecies                            |                                                                                                                                                                                   |
| Chaetoscypha            | Helotiaceae                              | Helotiaceae                                            |                                        | as "Pirottaea"                                                                                                                                                                    |
| <b>Chalara</b>          | <b>Pezizellaceae</b>                     | <b>Hyaloscyphaceae</b>                                 | <b>TypeSpecies</b>                     |                                                                                                                                                                                   |
| <b>Cheirospora</b>      | <b>Ascomycota incertae sedis (2)</b>     | <b>Mollisiaceae (3)</b>                                | <b>TypeSpecies</b>                     |                                                                                                                                                                                   |
| Chlorenchocelia         | Cenangiaceae                             | Cenangiaceae                                           | TypeSpecies                            |                                                                                                                                                                                   |
| Chlorociboria           | Chlorociboriaceae                        | Chlorociboriaceae                                      | TypeSpecies                            |                                                                                                                                                                                   |
| Chloroscypha            | Gelatinodiscaceae                        | Gelatinodiscaceae                                      |                                        |                                                                                                                                                                                   |
| <b>Chlorosplenium</b>   | <b>Helotiales incertae sedis</b>         | <b>Mollisiaceae</b>                                    | <b>TypeSpecies</b>                     |                                                                                                                                                                                   |
| <b>Chlorovibrisea</b>   | <b>Vibriseaceae</b>                      | <b>Helotiales incertae sedis (helotioid clade)</b>     | <b>TypeSpecies</b>                     |                                                                                                                                                                                   |
| Ciboria                 | Sclerotiniaceae                          | Sclerotiniaceae                                        |                                        |                                                                                                                                                                                   |
| Ciborinia               | Sclerotiniaceae                          | Sclerotiniaceae                                        | TypeSpecies                            |                                                                                                                                                                                   |
| <b>Cistella</b>         | <b>Hyaloscyphaceae</b>                   | <b>Helotiales (Stammaria lineage/Han Clade 9)</b>      |                                        |                                                                                                                                                                                   |
| <b>Cladochasiella</b>   | <b>Ascomycota incertae sedis (2)</b>     | <b>Discinella-Pezoloma lineage (3)</b>                 | <b>exTypeSpecimen</b>                  |                                                                                                                                                                                   |
| Clarireedia             | Rutstroemiaceae                          | Rutstroemiaceae                                        | TypeSpecies                            |                                                                                                                                                                                   |
| <b>Clathrosphaerina</b> | <b>Hyaloscyphaceae (2)</b>               | <b>Helotiales incertae sedis (3)</b>                   | <b>TypeSpecies</b>                     | sister to Arachnopezizaceae in ITS tree, but support needs confirming with additional genes; ITS sequence used matches that from ex type material (CBS 162.49, GenBank NR_159766) |
| <b>Clathrosporium</b>   | <b>Helotiales incertae sedis (2)</b>     | <b>Gelatinodiscaceae (3)</b>                           | <b>TypeSpecies</b>                     |                                                                                                                                                                                   |
| <b>Claussenomyces</b>   | <b>Tympanidaceae</b>                     | <b>Leotiales incertae sedis</b>                        |                                        |                                                                                                                                                                                   |
| Cleistothelobolus       | Thelebolaceae                            | Thelebolaceae (3)                                      | TypeSpecies                            |                                                                                                                                                                                   |
| Coccomyces              | Rhytismataceae                           | Rhytismataceae                                         |                                        |                                                                                                                                                                                   |
| Cochlearomyces          | Cochlearomycetaceae (2)                  | Cochlearomycetaceae (3)                                | ExTypeSpecimen                         | cf Leotiales                                                                                                                                                                      |
| <b>Coleophoma</b>       | <b>Leotiomyces incertae sedis (2)</b>    | <b>Dermateaceae (3)</b>                                |                                        |                                                                                                                                                                                   |
| <b>Collembolispora</b>  | <b>Helotiales incertae sedis (2)</b>     | <b>Ploettnerulaceae (3)</b>                            | <b>exTypeSpecimen</b>                  |                                                                                                                                                                                   |
| Collophorina            | Tympanidaceae                            | Tympanidaceae                                          | exTypeSpecimen                         |                                                                                                                                                                                   |
| Colpoma                 | Rhytismataceae                           | Rhytismataceae (3)                                     | TypeSpecies                            |                                                                                                                                                                                   |
| <b>Connersia</b>        | <b>Pseudeurotiaceae</b>                  | <b>Helotiaceae</b>                                     | <b>exTypeSpecimen</b>                  |                                                                                                                                                                                   |
| Coprotinia              | Sclerotiniaceae                          | Sclerotiniaceae (3)                                    | TypeSpecies                            |                                                                                                                                                                                   |
| Cordierites             | Cordieritidaceae                         | Cordieritidaceae                                       | TypeSpecies                            |                                                                                                                                                                                   |
| Cristulariella          | Sclerotiniaceae                          | Sclerotiniaceae (3)                                    | TypeSpecies                            |                                                                                                                                                                                   |
| Crocicreas              | Helotiales incertae sedis                | Helotiales incertae sedis (pezizelloid clade)          | TypeSpecies                            |                                                                                                                                                                                   |
| Crumenulopsis           | Cenangiaceae                             | Cenangiaceae (3)                                       | TypeSpecies                            |                                                                                                                                                                                   |
| <b>Cryptohymenium</b>   | <b>Dermateaceae (2)</b>                  | <b>Helotiales incertae sedis (sclerotinioid clade)</b> | <b>TypeSpecies</b>                     |                                                                                                                                                                                   |
| Cryptosporiopsis        | Dermateaceae                             | Dermateaceae                                           | TypeSpecies                            |                                                                                                                                                                                   |
| Cudonia                 | Cudoniaceae                              | Cudoniaceae (3)                                        | TypeSpecies                            |                                                                                                                                                                                   |
| Cudoniella              | Helotiaceae                              | Helotiaceae                                            |                                        | "Hymenoscyphus" varicosporioides clade                                                                                                                                            |
| <b>Curviclavula</b>     | <b>Helotiales incertae sedis (2)</b>     | <b>Pezizellaceae (3)</b>                               | <b>exTypeSpecimen</b>                  | <b>Han Clade 1 subclade</b>                                                                                                                                                       |

| genus                     | current family (1, 2)                   | accepted family (3)                                 | type status of specimens sequenced (4) | note                                                             |
|---------------------------|-----------------------------------------|-----------------------------------------------------|----------------------------------------|------------------------------------------------------------------|
| Cyathicula                | Helotiaceae                             | Helotiaceae (3)                                     | TypeSpecies                            |                                                                  |
| Cyclaneusma               | Marthamycetaceae                        | Marthamycetaceae                                    | exTypeSpecimen                         |                                                                  |
| Cyttaria                  | Cyttariaceae                            | Cyttariaceae                                        | TypeSpecies                            |                                                                  |
| Darkera                   | Phacidiaceae                            | Phacidiaceae (3)                                    | exTypeSpecimen                         |                                                                  |
| Dasyscyphella             | Lachnaceae                              | Lachnaceae                                          |                                        |                                                                  |
| Davidhawksworthia         | Dermateaceae (2)                        | Dermateaceae (3)                                    | exTypeSpecimen                         |                                                                  |
| Deltopyxis                | Leotiomyces incertae sedis              | Leotiomyces incertae sedis (3)                      | exTypeSpecimen                         |                                                                  |
| <b>Dematiocypha</b>       | <b>Hyaloscyphaceae</b>                  | <b>Helotiales (Han Clade 7)</b>                     | <b>TypeSpecies</b>                     |                                                                  |
| Dermea                    | Dermateaceae                            | Dermateaceae                                        |                                        |                                                                  |
| Dicephalospora            | Helotiaceae                             | Helotiaceae                                         |                                        |                                                                  |
| <b>Dimorphospora</b>      | <b>Helotiaceae (2)</b>                  | <b>Gelatinodiscaceae (3)</b>                        | <b>exTypeSpecimen</b>                  |                                                                  |
| Diplocarpa                | Cordieritidaceae                        | Cordieritidaceae                                    |                                        |                                                                  |
| Diplocarpon               | Drepanopezizaceae                       | Drepanopezizaceae                                   | TypeSpecies                            |                                                                  |
| Diplolaeviopsis           | Cordieritidaceae                        | Cordieritidaceae (3)                                |                                        |                                                                  |
| Discinella                | Discinella-Pezoloma lineage             | Discinella-Pezoloma lineage (3)                     | TypeSpecies                            |                                                                  |
| Duebenia                  | Calloriaceae                            | Helotiales (Stammnaria lineage/Han Clade 9) (3)     |                                        |                                                                  |
| Dumontinia                | Sclerotiniaceae                         | Sclerotiniaceae (3)                                 | TypeSpecies                            |                                                                  |
| Durella                   | Strossmayeria lineage                   | Strossmayeria lineage (3)                           |                                        | Durella connivens                                                |
| Eleutheromyces            | Helicogoniaceae                         | Helicogoniaceae (3)                                 | exTypeSpecimen                         |                                                                  |
| Elliottinia               | Sclerotiniaceae                         | Sclerotiniaceae (3)                                 | TypeSpecies                            |                                                                  |
| Elytroderma               | Rhytismataceae                          | Rhytismataceae (3)                                  | TypeSpecies                            |                                                                  |
| Encoelia                  | Cenangiaceae                            | Cenangiaceae                                        | TypeSpecies                            |                                                                  |
| <b>Endoscypha</b>         | <b>Hyaloscyphaceae</b>                  | <b>Helotiaceae (3)</b>                              | <b>TypeSpecies</b>                     |                                                                  |
| <b>Epicladonia</b>        | <b>Ascomycota incertae sedis (2)</b>    | <b>Phacidiaceae (3)</b>                             | <b>TypeSpecies</b>                     |                                                                  |
| Epiglia                   | Mniaceae lineage                        | Mniaceae                                            | TypeSpecies                            |                                                                  |
| Eriopezia                 | Arachnopezizaceae                       | Arachnopezizaceae (3)                               | TypeSpecies                            |                                                                  |
| Erysiphe                  | Erysiphaceae                            | Erysiphaceae                                        |                                        |                                                                  |
| Fabrella                  | Cenangiaceae                            | Cenangiaceae (3)                                    | TypeSpecies                            |                                                                  |
| Filosporella              | Ascomycota incertae sedis (2)           | Helotiales incertae sedis                           |                                        | type not sequenced, other species genetically divergent          |
| Flagellospora             | Nectriaceae (2)                         | Leotiales incertae sedis                            | TypeSpecies                            |                                                                  |
| <b>Fontanospora</b>       | <b>Helotiales incertae sedis (2)</b>    | <b>Discinella-Pezoloma lineage (3)</b>              | <b>TypeSpecies</b>                     |                                                                  |
| <b>Fulvoflamma</b>        | <b>Rhytismatales incertae sedis (2)</b> | <b>Phacidiaceae (3)</b>                             | <b>exTypeSpecimen</b>                  |                                                                  |
| <b>Fuscoclara</b>         | <b>Dermateaceae (2)</b>                 | <b>Mollisiaceae (3)</b>                             | <b>exTypeSpecimen</b>                  |                                                                  |
| <b>Gamarada</b>           | <b>Hyaloscyphaceae (2)</b>              | <b>Helotiales (Han Clade 4)</b>                     | <b>TypeSpecies</b>                     |                                                                  |
| Gelatinipulvinella        | Helicogoniaceae                         | Helicogoniaceae                                     | TypeSpecies                            |                                                                  |
| Gelatinodiscus            | Gelatinodiscaceae                       | Gelatinodiscaceae (3)                               | TypeSpecies                            |                                                                  |
| Gelatinomyces             | Tympanidaceae                           | Tympanidaceae (3)                                   | exTypeSpecimen                         |                                                                  |
| Gelatinopsis              | Helicogoniaceae                         | Helicogoniaceae                                     |                                        |                                                                  |
| Geltinia                  | Helicogoniaceae                         | Helicogoniaceae (3)                                 | TypeSpecies                            |                                                                  |
| Gemmina                   | Pezizellaceae                           | Pezizellaceae (3)                                   | TypeSpecies                            | Han Clade 1 subclade                                             |
| <b>Geomyces</b>           | <b>Myxotrichaceae</b>                   | <b>Pseudeurotiaceae (3)</b>                         | <b>exTypeSpecimen</b>                  |                                                                  |
| Glearea                   | Helotiaceae                             | Helotiaceae                                         | exTypeSpecimen                         |                                                                  |
| <b>Gloetinia</b>          | <b>Helotiaceae</b>                      | <b>Helotiales incertae sedis (3)</b>                | <b>TypeSpecies</b>                     | <b>ITS close to Cyttaria and Myxocephala</b>                     |
| Godronia                  | Godroniaceae                            | Godroniaceae                                        |                                        |                                                                  |
| Golovinomyces             | Erysiphaceae                            | Erysiphaceae                                        |                                        |                                                                  |
| <b>Gorgomyces</b>         | <b>Ascomycota incertae sedis (2)</b>    | <b>Leotiales incertae sedis (3)</b>                 | <b>exTypeSpecimen</b>                  |                                                                  |
| Graddonia                 | Helotiaceae                             | Helotiaceae (3)                                     |                                        | "Hymenoscyphus" varicosporioides clade                           |
| Gremmeniella              | Godroniaceae                            | Godroniaceae                                        | TypeSpecies                            |                                                                  |
| <b>Grovesiella</b>        | <b>Tympanidaceae</b>                    | <b>Godroniaceae (3)</b>                             | <b>TypeSpecies</b>                     |                                                                  |
| Grovesinia                | Sclerotiniaceae                         | Sclerotiniaceae (3)                                 | TypeSpecies                            |                                                                  |
| <b>Gymnostellatospora</b> | <b>Myxotrichaceae (2)</b>               | <b>Pseudeurotiaceae (3)</b>                         |                                        |                                                                  |
| Gyoeffyella               | Discinella-Pezoloma lineage             | Discinella-Pezoloma lineage                         |                                        |                                                                  |
| <b>Halenospora</b>        | <b>Leotiaceae (2)</b>                   | <b>Helotiaceae</b>                                  | <b>TypeSpecies</b>                     | <b>"Hymenoscyphus" varicosporioides clade; = Zalerion varium</b> |
| <b>Hamatocanthoscypha</b> | <b>Pezizellaceae</b>                    | <b>Pezizellaceae</b>                                | <b>TypeSpecies</b>                     |                                                                  |
| Haradamycetes             | Sclerotiniaceae                         | Sclerotiniaceae (3)                                 | TypeSpecies                            |                                                                  |
| Helicocentrals            | Leotiomyces incertae sedis (2)          | Helotiales incertae sedis (hyaloscyphoid clade) (3) | exTypeSpecimen                         | sister to Cairneyella                                            |
| <b>Helicodendron</b>      | <b>Helotiales incertae sedis (2)</b>    | <b>Gelatinodiscaceae (3)</b>                        | <b>TypeSpecies</b>                     |                                                                  |
| Heterosphaeria            | Heterosphaeriaceae                      | Heterosphaeriaceae (3)                              | TypeSpecies                            |                                                                  |
| Heyderia                  | Cenangiaceae                            | Cenangiaceae                                        | TypeSpecies                            |                                                                  |
| <b>Hispidula</b>          | <b>Hyaloscyphaceae</b>                  | <b>Helotiaceae</b>                                  |                                        |                                                                  |
| <b>Holwaya</b>            | <b>Tympanidaceae</b>                    | <b>Leotiomyces incertae sedis</b>                   | <b>TypeSpecies</b>                     |                                                                  |
| <b>Hyalodendriella</b>    | <b>Helotiales incertae sedis (2)</b>    | <b>Pezizellaceae (3)</b>                            | <b>exTypeSpecimen</b>                  | <b>Han Clade 1 subclade</b>                                      |
| Hyalopeziza               | Hyaloscyphaceae                         | Hyaloscyphaceae                                     |                                        |                                                                  |
| Hyaloscypha               | Hyaloscyphaceae                         | Hyaloscyphaceae                                     | TypeSpecies                            |                                                                  |
| <b>Hydrocina</b>          | <b>Discinella-Pezoloma lineage</b>      | <b>Helotiales incertae sedis (3)</b>                | <b>exTypeSpecimen</b>                  |                                                                  |
| Hymenoscyphus             | Helotiaceae                             | Helotiaceae                                         | TypeSpecies                            |                                                                  |
| Hymenotorrendiella        | Helotiaceae                             | Helotiaceae                                         | TypeSpecies (4)                        |                                                                  |
| <b>Hyphodiscus</b>        | <b>Hyaloscyphaceae</b>                  | <b>Helotiales (Han Clade 4)</b>                     | <b>TypeSpecies (4)</b>                 |                                                                  |
| <b>Hyphopeziza</b>        | <b>Hyaloscyphaceae</b>                  | <b>Helotiales (Han Clade 4)</b>                     | <b>TypeSpecies (4)</b>                 |                                                                  |
| Hypoderma                 | Rhytismataceae                          | Rhytismataceae                                      | TypeSpecies                            |                                                                  |
| Incrucipulum              | Lachnaceae                              | Lachnaceae                                          | TypeSpecies (4)                        |                                                                  |
| <b>Infundichalara</b>     | <b>incertae sedis</b>                   | <b>Pezizellaceae</b>                                | <b>exTypeSpecimen</b>                  |                                                                  |
| Ionimidotis               | Cordieritidaceae                        | Cordieritidaceae                                    | TypeSpecies                            |                                                                  |
| Kohninia                  | Sclerotiniaceae                         | Sclerotiniaceae (3)                                 | TypeSpecies                            |                                                                  |
| Lachnellula               | Lachnaceae                              | Lachnaceae                                          |                                        |                                                                  |
| <b>Lachnopsis</b>         | <b>Hyaloscyphaceae (2)</b>              | <b>Lachnaceae (3)</b>                               | <b>exTypeSpecimen</b>                  |                                                                  |
| Lachnum                   | Lachnaceae                              | Lachnaceae                                          |                                        |                                                                  |
| Laetinaevia               | Calloriaceae                            | Helotiales (Stammnaria lineage/Han Clade 9) (3)     |                                        |                                                                  |
| Lambertella               | Rutstroemiaceae                         | Rutstroemiaceae                                     | TypeSpecies                            |                                                                  |
| Lanzia                    | Rutstroemiaceae                         | Rutstroemiaceae                                     |                                        |                                                                  |
| Lareunionomyces           | Neolauriomycetaceae (2)                 | Neolauriomycetaceae (3)                             | exTypeSpecimen                         |                                                                  |
| Lasiobelonium             | Lachnaceae                              | Lachnaceae                                          |                                        |                                                                  |
| <b>Lemnoniera</b>         | <b>Helotiales incertae sedis (2)</b>    | <b>Discinella-Pezoloma lineage</b>                  | <b>TypeSpecies</b>                     |                                                                  |
| Leohumicola               | Leotiomyces incertae sedis (2)          | Helotiales (Stammnaria lineage/Han Clade 9) (3)     | exTypeSpecimen                         |                                                                  |
| Leotia                    | Leotiaceae                              | Leotiaceae                                          | TypeSpecies                            |                                                                  |
| Leptodontidium            | Helotiales incertae sedis (2)           | Helotiales (Han Clade 4) (3)                        | exTypeSpecimen                         | based on L. elatius ex ITS tree;                                 |
| Leuconeurospora           | Pseudeurotiaceae                        | Pseudeurotiaceae                                    | exTypeSpecimen                         |                                                                  |
| Limonella                 | Cordieritidaceae                        | Cordieritidaceae                                    |                                        |                                                                  |
| Lophodermium              | Rhytismataceae                          | Rhytismataceae (3)                                  |                                        |                                                                  |
| <b>Loramycetes</b>        | <b>Loramycetaceae</b>                   | <b>Mollisiaceae</b>                                 | <b>TypeSpecies</b>                     |                                                                  |
| Macroskyteta              | Helotiales incertae sedis (2)           | Cordieritidaceae (3)                                | exTypeSpecimen                         |                                                                  |
| Malbranchea               | Myxotrichaceae                          | Myxotrichaceae (3)                                  |                                        |                                                                  |
| <b>Margaritispora</b>     | <b>Helotiales incertae sedis (2)</b>    | <b>Discinella-Pezoloma lineage</b>                  | <b>TypeSpecies</b>                     | <b>based on LSU phylogeny using DQ267635 (unpubl. data)</b>      |
| Marssonina                | Drepanopezizaceae                       | Drepanopezizaceae                                   |                                        |                                                                  |
| Marthamycetes             | Marthamycetaceae                        | Marthamycetaceae                                    | TypeSpecies                            |                                                                  |
| <b>Mastigosporium</b>     | <b>Ascomycota incertae sedis (2)</b>    | <b>Ploettnerulaceae (3)</b>                         | <b>exTypeSpecimen</b>                  |                                                                  |
| Medeolaria                | Medeolariaceae                          | Medeolariaceae (3)                                  | TypeSpecies                            | cf Dermateaceae but on long branch                               |
| Melinomyces               | Hyaloscyphaceae                         | Hyaloscyphaceae                                     | TypeSpecies                            | = Hyaloscypha, Fehrer et al. 2019                                |
| Meloderma                 | Rhytismataceae                          | Rhytismataceae (3)                                  | TypeSpecies                            |                                                                  |
| Meria                     | Cenangiaceae                            | Cenangiaceae                                        | TypeSpecies                            |                                                                  |
| Microglossum              | Leotiaceae                              | Leotiaceae                                          | TypeSpecies                            |                                                                  |
| Microscypha               | Pezizellaceae                           | Pezizellaceae                                       |                                        |                                                                  |
| <b>Miniancora</b>         | <b>Ascomycota incertae sedis (2)</b>    | <b>Leotiales incertae sedis (3)</b>                 | <b>exTypeSpecimen</b>                  |                                                                  |

| genus                 | current family (1, 2)                   | accepted family (3)                                   | type status of specimens sequenced (4) | note                                                                                        |
|-----------------------|-----------------------------------------|-------------------------------------------------------|----------------------------------------|---------------------------------------------------------------------------------------------|
| Mitula                | Mitrulaceae                             | Mitrulaceae (3)                                       | TypeSpecies                            |                                                                                             |
| <b>Mitrolinia</b>     | <b>Helotiales incertae sedis</b>        | <b>Helotiaceae (3)</b>                                | <b>TypeSpecies</b>                     |                                                                                             |
| Mniaecia              | Mniaecia lineage                        | Mniaeciaceae                                          | TypeSpecies                            |                                                                                             |
| Moellerodiscus        | Rutstroemiaceae                         | Rutstroemiaceae                                       |                                        |                                                                                             |
| Mollisia              | Mollisiaceae                            | Mollisiaceae                                          | TypeSpecies                            |                                                                                             |
| Mollisina             | Pezizellaceae                           | Pezizellaceae                                         |                                        |                                                                                             |
| Monilinia             | Sclerotiniaceae                         | Sclerotiniaceae (3)                                   | TypeSpecies                            |                                                                                             |
| <b>Mycarthris</b>     | <b>Hyaloscyphaceae (2)</b>              | <b>Helotiales (Stammaria lineage/Han Clade 9) (3)</b> | <b>exTypeSpecimen</b>                  |                                                                                             |
| Mycochaetophora       | Ploettnerulaceae                        | Ploettnerulaceae (3)                                  |                                        |                                                                                             |
| <b>Mycofalcella</b>   | <b>Ascomycota incertae sedis (2)</b>    | <b>Helotiaceae</b>                                    | <b>exTypeSpecimen</b>                  | "Hymenoscyphus" varicosporioides clade                                                      |
| Mycopappus            | Sclerotiniaceae                         | Sclerotiniaceae (3)                                   | TypeSpecies                            |                                                                                             |
| Mycosymbiodes         | Leotiomycetes incertae sedis (2)        | Leotiales incertae sedis (3)                          | exTypeSpecimen                         |                                                                                             |
| Myriodiscus           | Typanidaceae                            | Typanidaceae                                          | TypeSpecies                            |                                                                                             |
| Myriosclerotinia      | Sclerotiniaceae                         | Sclerotiniaceae                                       | TypeSpecies                            |                                                                                             |
| <b>Myxocephala</b>    | <b>Sordariomycetes (2)</b>              | <b>Helotiales incertae sedis (3)</b>                  | <b>exTypeSpecimen</b>                  | ITS sister to Cyttaria                                                                      |
| Myxotrichum           | Myxotrichaceae                          | Myxotrichaceae (3)                                    | TypeSpecies                            |                                                                                             |
| Naemacyclus           | Marthamycetaceae                        | Marthamycetaceae                                      | TypeSpecies                            |                                                                                             |
| <b>Naevala</b>        | <b>Calloriaceae</b>                     | <b>Discinella-Pezoloma lineage (3)</b>                | <b>TypeSpecies</b>                     |                                                                                             |
| Neobulgaria           | Gelatinodiscaceae                       | Gelatinodiscaceae                                     | TypeSpecies                            |                                                                                             |
| Neocrinula            | Neocrinulaceae (2)                      | Neocrinulaceae (3)                                    | exTypeSpecimen                         |                                                                                             |
| Neocudoniella         | Gelatinodiscaceae                       | Bryoglossum lineage (3)                               | exTypeSpecimen                         |                                                                                             |
| Neodasyphypha         | Lachnaceae                              | Lachnaceae (3)                                        | TypeSpecies                            |                                                                                             |
| Neofabraea            | Dermateaceae                            | Dermateaceae                                          | exTypeSpecimen                         |                                                                                             |
| Nervostroma           | Sclerotiniaceae                         | Sclerotiniaceae (3)                                   | exTypeSpecimen                         |                                                                                             |
| Oculimacula           | Ploettnerulaceae                        | Ploettnerulaceae (3)                                  | TypeSpecies                            |                                                                                             |
| Oidiodendron          | Myxotrichaceae                          | Myxotrichaceae                                        | TypeSpecies (4)                        |                                                                                             |
| Olla                  | Hyaloscyphaceae                         | Hyaloscyphaceae                                       |                                        |                                                                                             |
| Orbiliopsis           | Helotiales incertae sedis               | Helotiales incertae sedis (3)                         |                                        |                                                                                             |
| Ovulinia              | Sclerotiniaceae                         | Sclerotiniaceae (3)                                   | TypeSpecies                            |                                                                                             |
| Pachycudonia          | Cudoniaceae                             | Cudoniaceae (3)                                       | TypeSpecies                            |                                                                                             |
| Parafabraea           | Dermateaceae                            | Dermateaceae                                          | exTypeSpecimen                         |                                                                                             |
| Patellina             | Helotiales incertae sedis               | Leotiomycetes incertae sedis (3)                      | TypeSpecies                            | sister to Holwaya                                                                           |
| Perrotia              | Lachnaceae                              | Lachnaceae (3)                                        | TypeSpecies                            |                                                                                             |
| Pezicula              | Dermateaceae                            | Dermateaceae                                          | exTypeSpecimen                         |                                                                                             |
| Pezoloma              | Discinella-Pezoloma lineage             | Discinella-Pezoloma lineage                           |                                        |                                                                                             |
| Phacidium             | Phaciaceae                              | Phaciaceae                                            | exTypeSpecimen (4)                     |                                                                                             |
| Phaeohelotium         | Helotiaceae                             | Helotiaceae                                           |                                        |                                                                                             |
| Phialina              | Pezizellaceae                           | Pezizellaceae                                         |                                        |                                                                                             |
| Phialocephala         | Mollisiaceae                            | Mollisiaceae                                          | exTypeSpecimen                         |                                                                                             |
| Phlyctema             | Dermateaceae                            | Dermateaceae                                          | TypeSpecies                            |                                                                                             |
| Piceomphale           | Sclerotiniaceae                         | Rutstroemiaceae                                       | TypeSpecies                            |                                                                                             |
| Pilidium              | Chaetomellaceae                         | Chaetomellaceae                                       | exTypeSpecimen                         |                                                                                             |
| <b>Pleuroascus</b>    | <b>Pseudeurotiaceae</b>                 | <b>Helotiaceae</b>                                    | <b>TypeSpecies</b>                     |                                                                                             |
| Poculum               | Rutstroemiaceae                         | Rutstroemiaceae                                       |                                        |                                                                                             |
| Polydesmia            | Helotiales incertae sedis               | Helotiales incertae sedis (sclerotinioid clade)       | TypeSpecies                            |                                                                                             |
| Polyphilus            | Hyaloscyphaceae                         | Helotiales (Stammaria lineage/Han Clade 9)            | exTypeSpecimen                         |                                                                                             |
| Porodiplodia          | Porodiplodiaceae                        | Pezizellaceae (3)                                     | exTypeSpecimen                         |                                                                                             |
| Potebniomyces         | Phaciaceae                              | Phaciaceae                                            | TypeSpecies                            |                                                                                             |
| Proliferodiscus       | Lachnaceae                              | Lachnaceae                                            | TypeSpecies (4)                        |                                                                                             |
| Propolis              | Marthamycetaceae                        | Marthamycetaceae                                      |                                        |                                                                                             |
| Pseudaegerita         | Hyaloscyphaceae                         | Hyaloscyphaceae (3)                                   | TypeSpecies                            | = Hyaloscypha, Fehrer et al. 2019                                                           |
| Pseudeurotium         | Pseudeurotiaceae                        | Pseudeurotiaceae                                      | exTypeSpecimen                         |                                                                                             |
| Pseudofabraea         | Dermateaceae                            | Dermateaceae                                          | exTypeSpecimen                         |                                                                                             |
| <b>Pseudographis</b>  | <b>Tribliaceae</b>                      | <b>Rhytismataceae</b>                                 | <b>TypeSpecies</b>                     |                                                                                             |
| Pseudogymnoascus      | Pseudeurotiaceae                        | Pseudeurotiaceae                                      | TypeSpecies                            |                                                                                             |
| <b>Pseudopezizula</b> | <b>Drepanopezizaceae</b>                | <b>Discinella-Pezoloma lineage (3)</b>                | <b>TypeSpecies</b>                     |                                                                                             |
| Pseudopeziza          | Drepanopezizaceae                       | Drepanopezizaceae (3)                                 |                                        |                                                                                             |
| Pseudophacidium       | Phaciaceae                              | Phaciaceae (3)                                        | TypeSpecies                            |                                                                                             |
| <b>Psilachnum</b>     | <b>Pezizellaceae</b>                    | <b>Helotiales (Stammaria lineage/Han Clade 9)</b>     |                                        |                                                                                             |
| <b>Psychrophila</b>   | <b>Helotiaceae (2)</b>                  | <b>Helotiales incertae sedis (3)</b>                  | <b>exTypeSpecimen</b>                  | sister to Arachnopezizaceae in ITS tree, but support needs confirming with additional genes |
| Pycnopeziza           | Sclerotiniaceae                         | Sclerotiniaceae (3)                                   | TypeSpecies                            |                                                                                             |
| Pyrenopeziza          | Ploettnerulaceae                        | Ploettnerulaceae (3)                                  |                                        |                                                                                             |
| Rhabdocline           | Cenangiaceae                            | Cenangiaceae (3)                                      | TypeSpecies                            |                                                                                             |
| Rhexocerosporidium    | Ploettnerulaceae                        | Ploettnerulaceae                                      | exTypeSpecimen                         | from ITS R. carotae                                                                         |
| Rhizocladosporium     | Helotiales incertae sedis (2)           | Helotiales incertae sedis (3)                         | exTypeSpecimen                         |                                                                                             |
| Rhizodermea           | Dermateaceae                            | Dermateaceae                                          | exTypeSpecimen                         |                                                                                             |
| Rhizoscyphus          | Hyaloscyphaceae                         | Hyaloscyphaceae                                       | TypeSpecies                            | = Hyaloscypha, Fehrer et al. 2019                                                           |
| Rhymbocarpus          | Cordieritidaceae                        | Cordieritidaceae                                      |                                        |                                                                                             |
| Rhynchosporium        | Ploettnerulaceae                        | Ploettnerulaceae                                      | TypeSpecies                            |                                                                                             |
| Rodwayella            | Pezizellaceae                           | Pezizellaceae (3)                                     | TypeSpecies                            |                                                                                             |
| <b>Roesleria</b>      | <b>Roesleriaceae</b>                    | <b>Helotiaceae</b>                                    | <b>TypeSpecies</b>                     |                                                                                             |
| Rommelaarsia          | Helotiales incertae sedis (2)           | Helotiales (Stammaria lineage/Han Clade 9)            | exTypeSpecimen                         |                                                                                             |
| Roseodiscus           | Helotiales incertae sedis               | Helotiales (Stammaria lineage/Han Clade 9)            | TypeSpecies                            |                                                                                             |
| Rutstroemia           | Rutstroemiaceae                         | Rutstroemiaceae                                       | TypeSpecies                            |                                                                                             |
| Sabahriopsis          | Helotiales incertae sedis (2)           | Cordieritidaceae (3)                                  | exTypeSpecimen                         |                                                                                             |
| <b>Satchmopsis</b>    | <b>Peizomycotina incertae sedis (2)</b> | <b>Leotiales incertae sedis (3)</b>                   | <b>TypeSpecies</b>                     |                                                                                             |
| <b>Scleromitula</b>   | <b>Sclerotiniaceae</b>                  | <b>Rutstroemiaceae (3)</b>                            | <b>TypeSpecies</b>                     |                                                                                             |
| Scleropezizula        | Pezizellaceae                           | Pezizellaceae (3)                                     | TypeSpecies                            |                                                                                             |
| Sclerotinia           | Sclerotiniaceae                         | Sclerotiniaceae                                       | TypeSpecies                            |                                                                                             |
| Scytalidium           | Leotiomycetes incertae sedis (2)        | Helotiales incertae sedis                             | exTypeSpecimen (4)                     | ITS, sister to Xylogone                                                                     |
| Solenopeziza          | Lachnaceae                              | Lachnaceae (3)                                        | TypeSpecies                            |                                                                                             |
| Soosiella             | Helotiales incertae sedis (2)           | Helotiales (Han Clade 4) (3)                          | exTypeSpecimen                         |                                                                                             |
| Spathularia           | Cudoniaceae                             | Cudoniaceae                                           | TypeSpecies                            |                                                                                             |
| Sphaerographium       | Chaetomellaceae                         | Chaetomellaceae (3)                                   |                                        |                                                                                             |
| <b>Spirosphaera</b>   | <b>Helotiales incertae sedis (2)</b>    | <b>Helotiaceae</b>                                    |                                        | "Hymenoscyphus" varicosporioides clade                                                      |
| Stammaria             | Stammaria lineage                       | Helotiales (Stammaria lineage/Han Clade 9)            |                                        |                                                                                             |
| Streptotinia          | Sclerotiniaceae                         | Sclerotiniaceae (3)                                   |                                        | as Streptobotrys, anamorph of Streptotinia                                                  |
| Stromatinia           | Sclerotiniaceae                         | Sclerotiniaceae (3)                                   | TypeSpecies                            |                                                                                             |
| Strossmayeria         | Strossmayeria lineage                   | Strossmayeria lineage                                 |                                        |                                                                                             |
| Synchaetomella        | Chaetomellaceae                         | Chaetomellaceae (3)                                   |                                        |                                                                                             |
| Tapesia               | Mollisiaceae                            | Mollisiaceae                                          | TypeSpecies                            |                                                                                             |
| Teberdina             | Pseudeurotiaceae                        | Pseudeurotiaceae (3)                                  | exTypeSpecimen                         | Pseudeurotium anamorph                                                                      |
| Terriera              | Rhytismataceae                          | Rhytismataceae                                        |                                        |                                                                                             |
| Tetrachaetum          | Discinella-Pezoloma lineage             | Discinella-Pezoloma lineage (3)                       | TypeSpecies                            |                                                                                             |
| Tetracladium          | Helotiales incertae sedis               | Helotiales (Stammaria lineage/Han Clade 9)            | TypeSpecies                            |                                                                                             |
| Thamnogalla           | Cordieritidaceae                        | Cordieritidaceae (3)                                  | TypeSpecies                            |                                                                                             |
| Thegdonia             | Drepanopezizaceae                       | Drepanopezizaceae (3)                                 | TypeSpecies                            |                                                                                             |
| Thelebolus            | Thelebolaceae                           | Thelebolaceae                                         | TypeSpecies                            |                                                                                             |
| Thuemenidium          | Leotiaceae                              | Leotiaceae                                            |                                        |                                                                                             |
| <b>Tiarospora</b>     | <b>Phaciaceae</b>                       | <b>Leotiomycetes incertae sedis (3)</b>               | <b>exTypeSpecimen</b>                  |                                                                                             |
| Torrendiella          | Rutstroemiaceae                         | Rutstroemiaceae (3)                                   | TypeSpecies                            |                                                                                             |
| Trichopeziza          | Lachnaceae                              | Lachnaceae                                            | TypeSpecies                            |                                                                                             |

| genus                   | current family (1, 2)                    | accepted family (3)                        | type status of specimens sequenced (4) | note                                   |
|-------------------------|------------------------------------------|--------------------------------------------|----------------------------------------|----------------------------------------|
| Trichopezizella         | Lachnaceae                               | Lachnaceae                                 | TypeSpecies (4)                        |                                        |
| Tricladium              | Helotiaceae (2)                          | Helotiaceae                                | TypeSpecies                            | "Hymenoscyphus" varicosporioides clade |
| Trimmatostroma          | Mollisiaceae                             | Mollisiaceae (3)                           | TypeSpecies                            |                                        |
| <b>Trizodia</b>         | <b>Mniaecia lineage</b>                  | <b>Leotiomycetes incertae sedis</b>        | <b>TypeSpecies</b>                     |                                        |
| Trochila                | Cenangiaceae                             | Cenangiaceae                               | TypeSpecies                            |                                        |
| Tromeropsis             | Leotiomycetes incertae sedis             | Leotiomycetes incertae sedis (3)           |                                        |                                        |
| Trybliopsis             | Rhytismataceae                           | Rhytismataceae                             | TypeSpecies                            |                                        |
| Tympanis                | Tympanidaceae                            | Tympanidaceae                              |                                        |                                        |
| Unguicularia            | Hyaloscyphaceae                          | Helotiales incertae sedis (3)              | TypeSpecies                            |                                        |
| Urceolella              | Hyaloscyphaceae                          | Helotiales (Stammaria lineage/Han Clade 9) | TypeSpecies                            |                                        |
| Valdensinia             | Sclerotiniaceae                          | Sclerotiniaceae (3)                        | TypeSpecies                            |                                        |
| Vandijkella             | Vandijkellaceae (2)                      | Vandijkellaceae                            | exTypeSpecimen                         |                                        |
| <b>Varicosporium</b>    | <b>Helotiaceae (2)</b>                   | <b>Discinella-Pezoloma lineage</b>         | <b>TypeSpecies</b>                     |                                        |
| Variocladium            | Mollisiaceae                             | Mollisiaceae (3)                           |                                        |                                        |
| Velutarina              | Cenangiaceae                             | Cenangiaceae (3)                           | TypeSpecies                            |                                        |
| <b>Venturiocistella</b> | <b>Hyaloscyphaceae</b>                   | <b>Helotiales (Han Clade 4)</b>            |                                        |                                        |
| Verpatinia              | Sclerotiniaceae                          | Sclerotiniaceae (3)                        | TypeSpecies                            |                                        |
| Vibrisea                | Vibriseaceae                             | Vibriseaceae                               | TypeSpecies                            |                                        |
| <b>Xenopolyscytalum</b> | <b>Helotiales incertae sedis (2)</b>     | <b>Pezizellaceae (3)</b>                   | <b>exTypeSpecimen</b>                  | <b>Han Clade 1 subclade</b>            |
| Xerombrophila           | Gelatinodiscaceae                        | Gelatinodiscaceae                          | TypeSpecies                            |                                        |
| Xeropilidium            | Chaetomellaceae                          | Chaetomellaceae                            | exTypeSpecimen                         |                                        |
| Xylogone                | Helotiales incertae sedis (2)            | Helotiales incertae sedis (3)              | exTypeSpecimen                         |                                        |
| Ypsilina                | Ploettnerulaceae                         | Ploettnerulaceae (3)                       | TypeSpecies                            |                                        |
| <b>Zymochalara</b>      | <b>Pezizomycotina incertae sedis (2)</b> | <b>Pezizellaceae (3)</b>                   | <b>exTypeSpecimen</b>                  |                                        |
